1 **Fatty acid oxidation impairs macrophage effector functions that control *Mycobacterium***  
2 ***tuberculosis***

3

4 Pallavi Chandra<sup>1,2</sup>, Li He<sup>3,4</sup>, Matthew Zimmerman<sup>5</sup>, Guozhe Yang<sup>1,2</sup>, Stefan Köster<sup>6,#</sup>, Mireille  
5 Ouimet<sup>7,†</sup>, Han Wang<sup>5</sup>, Kathryn J. Moore<sup>7</sup>, Véronique Dartois<sup>5</sup>, Joel D. Schilling<sup>3,4</sup>, and Jennifer  
6 A. Philips<sup>1,2\*</sup>

7

8

9 <sup>1</sup>Division of Infectious Diseases, Dept. of Medicine; <sup>2</sup>Dept. of Molecular Microbiology; <sup>3</sup>Dept.  
10 of Pathology and Immunology; <sup>4</sup>Cardiovascular Division, Dept. of Medicine; Washington  
11 University School of Medicine, St. Louis, MO 63110; <sup>5</sup> Center for Discovery and Innovation,  
12 Hackensack Meridian Health, Nutley, NJ 07003; <sup>6</sup>Division of Infectious Diseases and  
13 Immunology, Department of Medicine, New York University Medical Center, New York, NY,  
14 10016, USA. <sup>7</sup>Marc and Ruti Bell Vascular Biology and Disease Program, Leon H. Charney  
15 Division of Cardiology, Department of Medicine, New York University Medical Center, New  
16 York, NY, 10016, USA.

17

18 #Current affiliation: Sanofi NA BT Lab, 270 Albany St, Cambridge, Massachusetts, 02139

19 †Current affiliation: Department of Biochemistry, Microbiology, and Immunology, University of  
20 Ottawa, Ottawa, Ontario, Canada

21

22 \*Correspondence: [philips.j.a@wustl.edu](mailto:philips.j.a@wustl.edu)

23

## 24 **SUMMARY**

25 Macrophage activation involves metabolic reprogramming to support antimicrobial cellular  
26 functions. How these metabolic shifts influence the outcome of infection by intracellular pathogens  
27 remains incompletely understood. *M. tuberculosis* (Mtb) modulates host metabolic pathways and  
28 utilizes host nutrients, including cholesterol and fatty acids, to survive within macrophages. We  
29 found that intracellular growth of Mtb depends on host fatty acid catabolism: when host fatty acid  
30  $\beta$ -oxidation (FAO) was blocked chemically with trimetazidine, a compound in clinical use, or  
31 genetically by deletion of the mitochondrial fatty acid transporter carnitine palmitoyltransferase 2  
32 (CPT2), Mtb failed to grow in macrophages and its growth was attenuated in mice. Global  
33 metabolic profiling and mechanistic studies support a model in which inhibition of FAO generates  
34 mitochondrial reactive oxygen species, which enhance macrophage NADPH oxidase and  
35 xenophagy activity to better control Mtb infection. Thus, FAO inhibition promotes key  
36 antimicrobial functions of macrophages and overcomes immune evasion mechanisms of Mtb.

37

## 38 **INTRODUCTION**

39 Macrophages are at the forefront of innate immune defense and are required for microbial killing,  
40 tissue homeostasis and repair, inflammation, and development. A wealth of scientific studies  
41 describes how these cells recognize pathogen-associated molecular patterns (PAMPs), which  
42 activate downstream signaling cascades to drive pro-inflammatory responses and resolve  
43 infection. Macrophage activation involves profound metabolic reprogramming to support specific  
44 phenotypic functions. Exposure of macrophages to stimuli such as IFN- $\gamma$  and LPS induces an  
45 inflammatory phenotype characterized by enhanced glycolytic metabolism and impaired oxidative  
46 phosphorylation (OXPHOS), similar to the Warburg effect described for cancer cells. Glucose

47 catabolism provides a rapid means to generate ATP, and boosts the pentose phosphate pathway  
48 (PPP) and tricarboxylic acid (TCA) cycle for the generation of important immuno-metabolites  
49 such as NADPH, itaconate, and prostaglandins (Galván-Peña and O'Neill, 2014; Kelly and O'Neill,  
50 2015; Van den Bossche et al., 2017). On the other hand, cytokines such as IL-4 induce an anti-  
51 inflammatory phenotype in macrophages important for tissue homeostasis and anti-parasitic  
52 responses. These alternatively activated macrophages have increased FAO and OXPHOS (Galván-  
53 Peña and O'Neill, 2014). The majority of studies on macrophage metabolism focus on IFN $\gamma$ /LPS-  
54 and IL-4-induced states, although accumulating evidence suggests that macrophage polarization  
55 states are multi-dimensional (Xue et al., 2014). The metabolic characterization of more diverse  
56 macrophage phenotypes, and their impact on antimicrobial capacity in the context of specific  
57 infections is largely unexplored.

58

59 Recent studies also highlight a link between *Mycobacterium tuberculosis* (Mtb) pathogenesis and  
60 host metabolism. Mtb is the causative agent of tuberculosis (TB), which kills more people yearly  
61 than any other infection. Macrophages are a main cellular niche of Mtb (Cohen et al., 2018; Wolf  
62 et al., 2007). Within the lung, alveolar (AM) and interstitial (IM) macrophages are the major  
63 populations of infected macrophages, and they have distinct metabolic profiles. AMs, which  
64 preferentially utilize FAO, represent a permissive niche for Mtb replication, whereas glycolytically  
65 active IMs restrict infection (Huang et al., 2018). Mtb alters macrophage metabolism along with  
66 shifting macrophage phenotype to a more pro-inflammatory state (Arts et al., 2016; Cumming et  
67 al., 2018; Gleeson et al., 2016; Ouimet et al., 2016; Shi et al., 2015). Mtb enhances the dependency  
68 of mitochondrial oxidative metabolism on fatty acids, in particular exogenous fatty acids, and  
69 induces the formation of lipid-droplet-filled or “foamy” macrophages (Cumming et al., 2018;

70 Peyron et al., 2008a; Russell et al., 2009; Singh et al., 2012). Foamy macrophages are found within  
71 the inner layers of granulomas, a common histopathologic feature of TB, and the bacilli themselves  
72 can be found in close approximation to intracellular lipid droplets. It is thought that lipid bodies  
73 serve as a source of nutrients in the form of cholesterol esters and fatty acids for the bacilli, thus  
74 providing a hospitable niche for the bacterium (Brzostek et al., 2009; Daniel et al., 2011; Marrero  
75 et al., 2010; Munoz-Elias and McKinney, 2005; Pandey and Sasseti, 2008; Peyron et al., 2008b;  
76 Singh et al., 2012). Moreover, a growing body of literature suggests a link between lipid  
77 metabolism and cellular control of Mtb. A number of host-directed therapies (HDTs) under  
78 investigation for TB, such as statins and metformin, modulate host lipid metabolism (Parihar et  
79 al., 2014; Singhal et al., 2014). However, how these metabolic shifts influence the outcome of Mtb  
80 infection remains incompletely understood.

81  
82 Cellular regulators of lipid metabolism such as microRNA-33 (miR-33) and the transcription  
83 factors PPAR- $\alpha$  and PPAR- $\gamma$  play a role in the formation of Mtb-induced lipid droplets. Studies in  
84 which miR-33, PPAR- $\alpha$ , and PPAR- $\gamma$  were modulated revealed a correlation between cellular  
85 lipids and intracellular survival of mycobacteria, such that increased intracellular lipids were  
86 associated with enhanced bacterial replication (Almeida et al., 2009; Kim et al., 2017; Ouimet et  
87 al., 2016). These studies led to the idea that impaired host fatty acid catabolism and the formation  
88 of foamy macrophages serves to enhance intracellular survival of Mtb, but direct evidence is  
89 lacking. Indeed, miR-33, PPAR- $\alpha$ , and PPAR- $\gamma$  impact diverse aspects of host biology that  
90 influence the antimicrobial capacity of macrophages, including mitochondrial function and  
91 autophagy, and a causal link between the lipid changes they induce and the survival benefit to the  
92 bacilli has not been clearly established. Previously, we showed that induction of miR-33/33\* in

93 response to Mtb enhances intracellular survival of Mtb (Ouimet et al., 2016). We showed that this  
94 pro-bacterial function of miR-33/33\* was related in part to its ability to block autophagy, and we  
95 speculated that its ability to block fatty acid catabolism and promote the formation of lipid droplets  
96 also enhanced bacterial replication. Here, we tested whether blocking fatty acid catabolism indeed  
97 promotes Mtb replication, as prevailing models predict. Instead, we found that inhibiting  
98 macrophage FAO chemically or genetically restricted intracellular growth of Mtb. FAO inhibition  
99 promoted a pathway of bacterial killing in which induction of mitochondrial ROS (mitoROS) lead  
100 to NADPH oxidase and autophagy-dependent control of Mtb.

101

## 102 **RESULTS**

### 103 **Inhibiting FAO restricts growth of intracellular Mtb**

104 miR-33 inhibits FAO by targeting genes such as carnitine palmitoyltransferase 1 (CPT-1) and the  
105 hydroxyacyl-CoA dehydrogenase trifunctional multienzyme complex subunit beta (HADHB).  
106 CPT-1 is required for the entry of long chain fatty acids into the mitochondrial matrix, while  
107 HADHB catalyzes the final step of  $\beta$ -oxidation. Small molecule inhibitors, etomoxir (ETM),  
108 oxfenicine (OXF), and trimetazidine (TMZ) also target these steps in FAO. ETM and OXF inhibit  
109 CPT-1, whereas TMZ blocks the 3-ketoacyl-CoA thiolase activity of HADHB (**Figure 1A**). Thus,  
110 to determine whether the inhibition of FAO conferred by miR-33 contributed to its ability to  
111 enhance the intracellular survival of Mtb, we tested the effect of chemical inhibition of FAO on  
112 intracellular bacterial replication. We infected murine bone marrow-derived macrophages  
113 (BMDMs) with the H37Rv strain of Mtb, and four hours later, we supplemented the media with  
114 ETM, OXF, or TMZ. After treatment, we estimated intracellular Mtb growth by plating for colony  
115 forming units (CFU) at 72 hours post infection (hpi). Unexpectedly, treatment with all three FAO

116 inhibitors restricted the intracellular growth of Mtb compared to untreated controls. We observed  
117 a dose-dependent reduction in Mtb CFUs in macrophages treated with micromolar concentrations  
118 of ETM (**Figure 1B**), while TMZ and OXF were effective at nanomolar concentrations (**Figures**  
119 **1C and D**). The antitubercular activity of TMZ was corroborated using a live-dead reporter strain  
120 of Mtb (**Figure S1A**). By comparison, metformin (MET), which has previously been shown to  
121 restrict intracellular Mtb, worked at millimolar concentrations (Singhal et al., 2014) (**Figures 1B-**  
122 **D**). Using calcein fluorescent dye, we found that macrophage viability was unaffected by FAO  
123 inhibitors ETM and TMZ (**Figure S1B**). In addition, the inhibitors did not have direct toxicity on  
124 Mtb in broth culture (**Figure S1C and S1D**), and they enhanced macrophage control against a  
125 distantly related mycobacterium, *Mycobacterium abscessus* (**Figure S1E**). Consistent with the  
126 ability to impair FAO, TMZ enhanced cellular lipid accumulation based upon BODIPY staining  
127 (**Figure S1F**). In addition, in keeping with impaired fatty acid oxidation, TMZ treated  
128 macrophages had reduced oxygen consumption (**Figure S1G**), similar to macrophages from mice  
129 that were genetically deficient in FAO due to deletion of carnitine palmitoytransferase 2 (*Cpt2*<sup>fl/fl</sup>  
130 LysM-Cre<sup>+</sup>; *Cpt2* cKO) (Gonzalez-Hurtado et al., 2017).

131  
132 To confirm that the anti-mycobacterial activity was indeed a result of FAO inhibition, we  
133 compared the intracellular growth of Mtb in *Cpt2* cKO macrophages to littermate controls. As  
134 shown in **Figure 1E**, Mtb was significantly impaired in *Cpt2* cKO macrophages as compared to  
135 control. Moreover, FAO inhibitors lacked activity in *Cpt2* cKO macrophages, confirming their  
136 target specificity (**Figure 1F**). To determine whether FAO inhibitors were also active against Mtb  
137 in human macrophages, we treated PMA-differentiated THP-1 cells. As we found in murine  
138 macrophages, FAO inhibitors impaired Mtb growth in THP-1 cells (**Figure 1G**). Taken together,

139 our findings suggest that FAO inhibition enhances the ability of macrophages to control Mtb  
140 infection. Since ETM is documented to have off-target effects (Divakaruni et al., 2018) and TMZ  
141 was effective at nanomolar concentrations, we elected it for further study.

142

### 143 **Inhibiting FAO restricts growth of Mtb *in vivo***

144 Given our *in vitro* findings, we investigated whether inhibition of FAO impacts mycobacterial  
145 control in mice. We compared Mtb infection in mice with myeloid-specific knockout of *Cpt2*  
146 (*Cpt2<sup>fl/fl</sup> LysM-Cre<sup>+</sup>; Cpt2 cKO*) and littermate controls. We exposed mice to Mtb by aerosol and  
147 estimated lung bacterial burden after 7 days. We observed that growth of Mtb was significantly  
148 reduced in *Cpt2* cKO mice compared to controls (**Figure 2A**). To determine whether chemical  
149 inhibition of FAO had antimicrobial activity in mice, we first performed pharmacokinetic (PK)  
150 studies to establish a TMZ dosing strategy (**Figure S2A and S2B**). The half-life of TMZ in people  
151 is approximately 6 hours, but in mice the half-life by oral or IV route was less than 1 hour, so we  
152 used Alzet osmotic pumps to deliver a continuous dose over 2 weeks (**Figure S2C**). First, we  
153 examined the ability of TMZ to reduce bacterial burden during acute infection. In the first study  
154 we infected mice with 1000-2000 Mtb CFUs and treated them with saline or TMZ for 2 weeks.  
155 We found that mice treated with 16.8 mg/kg/day TMZ experienced a 67% reduction in lung  
156 bacterial burden compared to animals in the control group (**Figure 2B**). A significant decrease in  
157 spleen CFU was also observed with 16.8 mg/kg/day TMZ treatment (**Figure 2C**). In a second  
158 study, we infected mice with 3000 CFUs, tested a higher TMZ dose range, and included PK  
159 analysis of infected animals. In this study, 16.8 mg/kg/day showed a trend towards reduced  
160 bacterial growth, which was not statistically significant, while the animals receiving 50 mg/kg/day  
161 experienced a 29% reduction in bacterial burden compared to saline controls (**Figure 2D and 2E**).

162 In this group, TMZ treatment did not reduce Mtb CFU in spleen. During acute infection, the  
163 majority of Mtb bacilli are found within alveolar macrophages, suggesting that TMZ was active in  
164 this cell population. As infection progresses, additional phagocytic cells, including recruited  
165 monocytes, neutrophils, and dendritic cells become increasingly infected (Cohen et al., 2018; Wolf  
166 et al., 2007). To test whether TMZ was active in the setting of chronic infection, we began TMZ  
167 treatment 5 weeks post-infection and analyzed bacterial burden after 2 weeks of drug treatment.  
168 PK analysis was performed on infected mice 5 days after start of therapy and at end of treatment.  
169 In the setting of chronic infection, we found that TMZ treatment reduced bacterial burdens in the  
170 lungs by 35%, and in the spleen by 23% and 43%, in the 16.8 mg/kg and 50 mg/kg groups (**Figure**  
171 **2F and 2G**). TMZ serum concentrations of 130 ng/ml and 370 ng/ml were achieved at the end of  
172 therapy for the 16.8 and 50 mg/kg/day groups, respectively (**Figure 2H**). TMZ is approved by the  
173 European Medicines Agency to treat angina, and the  $C_{max}$  obtained after a single 40 mg oral dose  
174 in humans is 127 ng/ml. Because there is higher serum protein binding in mice than humans  
175 (**Figure S2D**), the level achieving a similar free drug concentration in mice would be  
176 approximately 164 ng/ml. Thus, TMZ showed antimycobacterial activity at drug concentrations  
177 that are used clinically. In addition, consistent with the extremely wide therapeutic index of TMZ  
178 in preclinical toxicology studies (Harpey et al., 1988), no treatment related morbidity or mortality  
179 was observed in any of the studies. Overall, we conclude that inhibiting host fatty acid metabolism  
180 restricts mycobacterial growth *in vivo*.

181

## 182 **FAO inhibition enhances metabolic changes in macrophages in response to Mtb infection**

183 We turned to *in vitro* studies to assess how host fatty acid metabolism was influencing control of  
184 Mtb. Given the increasing appreciation of a link between metabolism and immunity, we globally



185 profiled metabolites to assess the effect of Mtb infection alone or when macrophage FAO was  
186 inhibited. Uninfected macrophages or those that had been infected for 4h were treated for 3h or  
187 24h with TMZ or solvent control before profiling (**Figure 3A**). More than 500 metabolites were  
188 detected, and in agreement with previous reports, Mtb infection caused dramatic changes in  
189 macrophage metabolites (**Figure 3: Figure S3; Table S1**); we observed evidence of increased  
190 glycolytic and pentose phosphate pathway (PPP) flux (**Figure 3B**), itaconate production (**Figure**  
191 **3C**), ROS and reactive nitrogen intermediates (RNI) production (**Figure 3DE, 3E and Figure**  
192 **S3A**), phospholipid and sphingomyelin changes (**Figure S3B**), and tryptophan metabolism  
193 (**Figure S3C**). As discussed below, on its own TMZ did not significantly alter metabolic profiles  
194 in uninfected macrophages, but in some cases it enhanced infection-induced changes.

195  
196 We observed increases in several glycolytic intermediates (**Figure 3B**), which suggest augmented  
197 glucose catabolism in Mtb-infected macrophages. Early after infection, glucose levels declined in  
198 Mtb versus control groups, while glucose-6-phosphate and hexose diphosphates (detected as  
199 isobar) accumulated. After 24h of Mtb infection, the glucose levels were comparable to uninfected  
200 controls, but we observed accumulation in glycolytic intermediates such as phosphoenolpyruvate.  
201 The magnitude of responses induced by infection appeared to be greater in TMZ-treated groups.  
202 For instance, 24 hpi glucose-6-phosphate was increased 1.52-fold increase by Mtb in drug-exposed  
203 cells and 1.12-fold in the absence of TMZ. Glucose can be shunted to the pentose phosphate  
204 pathway (PPP) resulting in formation of NADPH reducing power and pentose intermediates for  
205 nucleotide biosynthesis. We found that metabolites specific to the PPP, 5-phosphoribosyl  
206 diphosphate (PRPP) and sedoheptulose-7-phosphate, increased over time in Mtb-infected

207 macrophages, and again, the level of these metabolites was slightly greater upon TMZ treatment  
208 **(Figure 3B, Table S1).**

209  
210 Classically activated macrophages utilize TCA cycle intermediates for anabolic process and  
211 immune pathway signaling. They have a characteristic TCA cycle breakpoint in the conversion of  
212 isocitrate to  $\alpha$ -ketoglutarate. This allows production of itaconate, an antimicrobial metabolite, from  
213 cis-aconitate **(Figure 3C)** (Lampropoulou et al., 2016; Michelucci et al., 2013; Nair et al., 2018).  
214 A second TCA cycle breakpoint occurs after succinate. As expected, we observed markedly  
215 increased itaconate in infected macrophages, as well as elevated succinate **(Figure 3C)**. There was  
216 no substantial difference in the infection-induced elevation in itaconate or succinate in response to  
217 TMZ treatment, suggesting these metabolites did not account for the enhanced antimicrobial effect  
218 of TMZ.

219  
220 The global metabolomics data also showed evidence of increased oxidative stress in Mtb infected  
221 in macrophages relative to uninfected controls, which appeared more pronounced in TMZ-treated  
222 samples compared to untreated controls. We observed elevations in citrulline levels early after  
223 infection, reflecting the activity of iNOS, which converts arginine to citrulline and NO **(Figure**  
224 **3D)**. This was accompanied by significant increases in dihydrobiopterin and biopterin **(Figure**  
225 **S3A)**. These compounds represent oxidized forms of tetrahydrobiopterin, a cofactor in NO  
226 synthesis. Early after infection, the antioxidants glutathione and ophthalmate, a compositional  
227 derivative of glutathione, were increased by infection, suggesting enhanced glutathione synthetase  
228 activity **(Figure S3A)**. This was accompanied by increases in gamma-glutamyl amino acids, which  
229 reflect the transfer of gamma-glutamyl moiety of glutathione to acceptor amino acids. (e.g.

230 gamma-glutamylglutamine) (**Figure S3A**). After 24 hpi, we observed increases in betaine,  
231 dimethylglycine, S-adenosylmethionine (SAM), S-adenosylhomocysteine (SAH) and cystathione  
232 (**Figure S3A**). These shifts could indicate increased methionine to cysteine conversion to support  
233 glutathione synthesis. Infected cells appeared to have a more oxidized intracellular milieu after  
234 TMZ treatment, as we observed more oxidized glutathione (**Figure 3E**). Additionally, at the later  
235 time point, there were greater infection-induced shifts in SAM, SAH and cystathione levels in  
236 infected TMZ-treated cells compared to untreated controls. Combined, the alterations in the  
237 glycolytic pathway, itaconate production, and redox homeostasis suggest that macrophages adopt  
238 a more M1-like metabolic phenotype in response to Mtb infection, and TMZ-induced perturbations  
239 may enhance or prolong these changes, but do not dramatically alter the response.

240

#### 241 **FAO inhibition triggers mitochondrial ROS to promote mycobacterial control**

242 The metabolomics data did not point to a particular metabolite or metabolic pathway to explain  
243 the antimicrobial activity of TMZ. Additionally, we measured the production of TNF- $\alpha$ , IL-6,  
244 CXCL2, IFN- $\beta$ , CCL2, and CXCL10 in response to infection and TMZ treatment, and we did not  
245 observe a cytokine-driven antimicrobial response upon TMZ treatment (**Figure S4**). Since TMZ  
246 acts in the mitochondria, a major site of ROS production, and there was evidence of an increase in  
247 oxidative stress in TMZ-treated macrophages, we examined whether FAO inhibition promotes  
248 ROS production. We treated uninfected immortalized BMDMs (iBMDMs) with TMZ and  
249 observed an increase in ROS as early as 3 hours after treatment (**Figure 4A**). Addition of  
250 mitoTEMPO, a mitochondrial ROS (mitoROS) scavenger, abolished this ROS burst, whereas DPI,  
251 which inhibits NADPH oxidase had no effect, suggesting that the ROS was induced in the  
252 mitochondria (**Figure 4A**). Toll-like receptor activation and infection with Gram negative bacteria

253 have previously been shown to result in mitoROS production (Mills et al., 2016; West et al., 2011),  
254 and Mtb infection induced a small amount of mitoROS (**Figure 4B**). However, significantly more  
255 ROS was generated in Mtb-infected BMDMs after TMZ treatment (**Figure 4C**). ROS levels in  
256 Mtb-infected *Cpt2* cKO BMDMs were also significantly higher than in control macrophages  
257 (**Figure 4D**). The TMZ-induced ROS still occurred in macrophages that lacked the NADPH  
258 oxidase (*Nox2* KO), consistent with a mitochondrial source (**Figure 4C**). We confirmed that TMZ  
259 induced mitoROS by using MitoSox fluorescent dye (**Figure 4E**). Combined these results  
260 demonstrate that TMZ induces ROS from a mitochondrial source after 3 hours of treatment in both  
261 infected and uninfected macrophages.

262

263 We hypothesized that FAO inhibition resulted in mitoROS generation because of perturbed  
264 electron flow within the electron transport chain (ETC). ROS can be generated in multiple sites  
265 along the ETC during forward electron transport, as well as when electrons flow in reverse through  
266 complex I (NADH:coenzymeQ reductase) (Scialò et al., 2017). To determine the site within the  
267 ETC where TMZ induced ROS, we measured mitoROS production in macrophages treated with  
268 TMZ in combination with rotenone, an inhibitor of complex I. When electrons are flowing in the  
269 forward direction, rotenone prevents electron transport to CoQ, resulting in ROS generation. In  
270 contrast during reverse electron transport (RET), rotenone reduces ROS by preventing CoQ from  
271 transferring electrons back to complex I, where the RET-ROS is generated. We treated uninfected  
272 BMDMs with TMZ for 3h, and thirty minutes prior to measuring mitoROS we added rotenone. As  
273 expected, rotenone and TMZ on their own increased mitoROS production. In contrast, rotenone  
274 decreased the amount of ROS generated in response to TMZ treatment (**Figure 4E**) These findings

275 are consistent with the idea that under conditions of TMZ treatment there is enhanced ROS  
276 generated due to RET at complex I.

277

278 Since recent studies have shown that mitoROS contributes to microbial control in macrophages  
279 (Abuaita et al., 2018; West et al., 2011), we asked whether TMZ-induced mitoROS was important  
280 for infection control or simply a by-product of metabolic perturbations. To address this, we  
281 estimated Mtb burden in macrophages treated with TMZ alone or in combination with  
282 mitoTEMPO. As shown in **Figure 4F**, mitoTEMPO on its own had little effect on the infection,  
283 but it partially reversed the antimicrobial effect of TMZ treatment. Overall, we conclude that FAO  
284 inhibition promotes mitoROS production from the ETC, which enhances macrophage control of  
285 Mtb infection.

286

### 287 **FAO inhibition-induced mitochondrial ROS drives NADPH oxidase recruitment to** 288 **phagosomes**

289 Previous studies suggest a link between mitoROS and NADPH oxidase that contributes to  
290 macrophage defense (Garaude et al., 2016). Indeed, while 3 h of TMZ treatment significantly  
291 increased mitoROS in both wt and *Nox2* KO BMDMs (**Figure 4C**), we observed that the anti-Mtb  
292 activity of FAO inhibitors required NADPH oxidase (**Figure 5A**). This suggested that the  
293 antimycobacterial activity in FAO-inhibited macrophages actually depended upon both a  
294 mitochondrial source and NADPH oxidase. Normally, pathogen associated molecular patterns  
295 (PAMPs) promote the recruitment of the NADPH oxidase to microbial phagosomes immediately  
296 after phagocytosis (Nunes et al., 2013). However, Mtb impairs the recruitment of the NADPH

297 oxidase to the mycobacterial phagosome (Köster et al., 2017; Sun et al., 2013). Remarkably, at 24  
298 hpi we observed that TMZ increased the recruitment of NADPH oxidase subunits gp91<sup>phox</sup>/NOX2  
299 and p40<sup>phox</sup> to the mycobacterial phagosomes (**Figure 5B, C and D**). Moreover, we found that  
300 NADPH oxidase recruitment was dependent on TMZ-induced mitoROS, as it was reversed with  
301 the addition of mitoTEMPO (**Figure 5E**). Thus, FAO inhibition appears to enhance two  
302 antimicrobial responses that are suboptimal during Mtb infection, mitoROS production and  
303 phagosomal recruitment of the NADPH oxidase. Mitochondria alone contributed to ROS within  
304 3h of FAO inhibition, while the role of NADPH oxidase was appreciable at later time points, and  
305 macrophage control of Mtb depended upon both mitoROS and the NADPH oxidase.

306

### 307 **FAO inhibition promotes xenophagy to restrict intracellular Mtb growth**

308 TMZ treatment in Mtb-infected macrophages resulted in increases in phospholipids and  
309 sphingomyelin, which might alter phagosomal trafficking (**Figure S3B**). In addition, ROS  
310 generated by the NADPH oxidase promote a trafficking pathway called LC3-associated  
311 phagocytosis (LAP). Both LAP and autophagy of microbes (xenophagy) are characterized by the  
312 association of lipidated LC3 (LC3-II) with microbe-containing vacuoles (Martinez et al., 2015).  
313 LAP and xenophagy depend upon certain common ATG (autophagy related) proteins, and they  
314 also have unique requirements. To determine whether either LC3-trafficking pathway was  
315 involved in the antimicrobial activity of TMZ, we compared the efficacy of TMZ between control  
316 and *Atg5* cKO macrophages, which are deficient in both LAP and xenophagy. Indeed, the  
317 antimycobacterial control established by FAO inhibition was reversed in *Atg5*-deficient  
318 macrophages (**Figure 6A**). Although the baseline ROS staining was lower in *Atg5* cKO  
319 macrophages compared to control, ROS was still induced by TMZ in *Atg5* cKOs, suggesting that

320 ATG5 acts downstream of mitoROS production (**Figure 6B**). To distinguish xenophagy from  
321 LAP, we examined *Atg14l* cKO and *Parkin2* KO macrophages, which are specifically involved in  
322 xenophagy. As we had seen in *Atg5* cKO macrophages, the antimycobacterial control established  
323 by FAO inhibition was reversed in *Atg14l* cKO and *Parkin2* KO as well (**Figure 6C and 6D**). In  
324 addition, in wt macrophages, TMZ treatment resulted in enhanced co-localization between Mtb  
325 and the autophagy adaptor, p62 (**Figure 6E**). The enhanced colocalization between Mtb and p62  
326 occurred after 24 hours treatment and was dependent on mitoROS (**Figure 6F and 6G**).  
327 Combined, these data demonstrate that inhibition of FAO promotes xenophagy to control  
328 intracellular Mtb growth. Indeed, autophagosomal targeting of Mtb was also inherently higher in  
329 *Cpt2* cKO macrophages as compared to wt controls (**Figure 6H and 6I**). Moreover, TMZ  
330 treatment facilitated xenophagy of a mutant Mtb strain lacking *esxA* ( $\Delta esxA$ ), which is unable to  
331 perforate phagosomes and usually does not activate xenophagy (**Figure 6J**).

332

333 These studies established that FAO inhibition induced mitoROS, which promoted NADPH  
334 oxidase recruitment to the Mtb phagosome and xenophagy. Next we examined the relationship  
335 between the NADPH oxidase and xenophagy. We observed that the enhanced NADPH oxidase  
336 recruitment in response to TMZ occurred independently of autophagy, as it was also seen in *Atg5*  
337 cKO macrophages (**Figure 6K**). On the other hand, TMZ failed to promote xenophagy in NADPH  
338 oxidase-deficient macrophages (**Figure 6L**). Taken together, our data shows that mitoROS was  
339 the primary signal induced by FAO inhibition that resulted in enhanced NADPH oxidase and  
340 xenophagy, which promoted bacterial control.

341

342 **DISCUSSION**

343 Recent work has highlighted the relationship between macrophage metabolism and inflammatory  
344 phenotype (Escoll and Buchrieser, 2019). Within the context of Mtb infection, macrophages  
345 undergo a Warburg-like shift with enhanced aerobic glycolysis (Gleeson et al., 2016; Lachmandas  
346 et al., 2016; Shi et al., 2015) and usage of TCA cycle intermediates for the generation of immuno-  
347 metabolites (Nair et al., 2018). Mtb-induced glycolysis reduces intracellular bacterial survival  
348 through enhanced IL-1 $\beta$  production, but the impact of fatty acid metabolism is not well established.  
349 Mtb also dramatically alter host lipid metabolism, promoting the formation of lipid-droplets  
350 (Cumming et al., 2018; Peyron et al., 2008a; Russell et al., 2009; Singh et al., 2012) and increasing  
351 mitochondrial dependency on exogenous fatty acids (Cumming et al., 2018). Because Mtb can  
352 utilize host fatty acids as a carbon source during infection, a prevailing idea is that host and  
353 pathogen are in competition for resources, so that reduced host consumption or enhanced  
354 production of cellular lipids would provide a nutrient source for bacterial replication (Almeida et  
355 al., 2009; Kim et al., 2017; Ouimet et al., 2016). Instead, we found that inhibition of host FAO  
356 impaired mycobacterial replication. Our initial *in vitro* results are in concordance with a recent  
357 report that showed the efficacy of FAO inhibitor ETM in Mtb-infected BMDMs (Huang et al.,  
358 2018). In that study, the antimicrobial effect was attributed to reduced IFN- $\beta$ , but ETM was used  
359 at 200  $\mu$ M, which has well-documented off-target effects (Divakaruni et al., 2018). We did not see  
360 effects on Type I IFN (Figure S4), and we establish the antimicrobial mechanism of FAO inhibition  
361 using specific inhibitors and genetically FAO-deficient *Cpt2* knockout macrophages.  
362 Unexpectedly, we found that blocking FAO enhanced macrophage effector functions by eliciting  
363 mitoROS, which promoted NADPH oxidase and xenophagy to restrict Mtb infection. Our results  
364 suggest mitoROS as a connecting link between macrophage fatty acid metabolism and macrophage  
365 effector functions to control Mtb infection.



366

367 The earliest cellular response that we could detect after FAO inhibition was induction of mitoROS,  
368 which occurred within three hours of treatment in both infected and uninfected macrophages.  
369 Typically, FAO products, such as NADH and FADH<sub>2</sub>, are oxidized by respiratory chain  
370 supercomplexes to generate the forward electron flow (FET) required for ATP production. The  
371 respiratory chain is organized into interacting supercomplexes to minimize leakage of electrons  
372 and ROS formation. Recent studies report that enzymes of FAO also physically interact with ETC  
373 components, forming an integrated, multifunctional complex (Wang et al., 2019). The FAO  
374 trifunctional protein (TFP), a tetramer that includes the target of TMZ (3-ketoacyl-CoA  
375 thiolase/HADHB), interacts with the NADH-binding domain of complex I. The presence of ETC  
376 supercomplexes dedicated to FAO may explain why FAO inhibition leads to mitoROS. In the  
377 absence of NADH shuttling from FAO to these dedicated supercomplexes, RET might occur. This  
378 fits with our finding that combined treatment with TMZ and rotenone, a complex I inhibitor,  
379 decreased mitoROS levels, consistent with RET generating the ROS at complex I. mitoROS is  
380 also generated in response to microbial products; toll-like receptor signaling alters supercomplex  
381 assembly and generates RET-ROS at complex I, both of which impact immunological signaling  
382 (Garaude et al., 2016; Langston et al., 2019; Mills et al., 2016; West et al., 2011). Thus, the  
383 mitoROS induced by TMZ may activate an antimicrobial pathway that is normally induced and  
384 protective in the context of other infection, but suboptimal in during Mtb infection. Interestingly,  
385 in distinction to our finding that FAO inhibition generated mROS, the reverse relationship was  
386 seen in *Salmonella* infected zebrafish larvae and J774.2 murine macrophage cells, where FAO  
387 enhanced *Salmonella*-induced mROS (Hall et al., 2013). The difference between this previous

388 study and ours could be due to the experimental systems, and it may reflect a different metabolic  
389 response of macrophages to mycobacteria as compared to *Salmonella*.

390

391 The idea that FAO inhibition enhances macrophage control of Mtb by generating mitoROS is  
392 consistent with recent studies showing that mitoROS contributes to macrophage control of  
393 *Streptococcus pneumoniae*, *Staphylococcus aureus*, and *Salmonella typhimurium* (Abuaita et al.,  
394 2018; Bewley et al., 2017; Hall et al., 2013; West et al., 2011). Our results suggest that mitoROS  
395 does not exert its antimicrobial function by directly killing Mtb, since mitoROS was generated in  
396 macrophages lacking *Nox2* and *Atg5*, but the antimycobacterial activity was lost. Rather, mitoROS  
397 appears to serve as a signal that enhances NADPH oxidase activity and xenophagy. A stimulatory  
398 effect of mitoROS on the NADPH oxidase has been documented most extensively in non-  
399 lymphoid cells, and recent work shows that in neutrophils mitoROS activates the NADPH oxidase  
400 and other effector functions (Nazarewicz et al., 2013; Pinegin et al., 2018; Vorobjeva et al., 2017).  
401 In addition to promoting the phagosomal recruitment of NADPH oxidase to mycobacterial  
402 phagosomes, our metabolomics data indicate that FAO inhibition may augment the PPP, which  
403 would enhance NADPH production to power the NADPH oxidase.

404

405 It will be important to understand how mitoROS promotes phagosomal assembly of the NADPH  
406 oxidase. NADPH oxidase assembly requires membrane trafficking of two integral membrane  
407 subunits (p22<sup>phox</sup> and gp91<sup>phox</sup>) followed by recruitment of the cytosolic subunits (p40<sup>phox</sup>, p47<sup>phox</sup>,  
408 p67<sup>phox</sup>). Normally this occurs shortly after uptake of phagocytic cargo that activate pathogen  
409 recognition receptors. In our experimental system, the kinetics are very different than what is  
410 typically described. We added TMZ 4h after Mtb had been added to macrophages and when

411 extracellular bacilli had been washed away. We found that TMZ enhanced localization of both the  
412 gp91<sup>phox</sup> and p40<sup>phox</sup> subunits with mycobacterial phagosomes 24 hours later. This suggests that  
413 signals generated by mitoROS either overcome a Mtb-induced blockade to NADPH oxidase  
414 recruitment or promote recruitment through a previously unappreciated pathway. How mitoROS  
415 regulates phagosomal NADPH oxidase recruitment and assembly will be important to establish in  
416 future studies, as our work indicates that it can be augmented, even after bacterial uptake, to  
417 promote microbial clearance of intracellular bacilli. This might be a way to clear foci of persistent  
418 bacilli.

419

420 In addition to NADPH oxidase recruitment, mitoROS also promoted xenophagy. Xenophagy and  
421 LAP are related LC3-trafficking pathways that can promote microbial clearance (Upadhyay and  
422 Philips, 2019). They also differ, as LAP occurs immediately after phagocytosis and involves LC3  
423 recruitment to a single phagosomal membrane, whereas xenophagy depends upon formation of a  
424 double membrane compartment. We found that the antimicrobial activity of TMZ depended on  
425 ATG14L and PARKIN, which are required for canonical autophagy and Mtb xenophagy  
426 (Manzanillo et al., 2013). In addition, TMZ enhanced the association of phagosomes with p62, a  
427 selective autophagy adaptor, and the response occurred well after bacterial uptake, all of which  
428 suggest that the mechanism of clearance is xenophagy and not LAP, despite the involvement of  
429 NADPH oxidase which has been linked to LAP. We also cannot rule out that both LAP and  
430 xenophagy are enhanced by FAO inhibition. In terms of how the NADPH oxidase might activate  
431 xenophagy, one possibility is that the NADPH oxidase generates phagosomal membrane damage,  
432 which is known to promote pathogen ubiquitination, adaptor recruitment, and xenophagy  
433 (Manzanillo et al., 2012; Wong and Jacobs, 2011). We observed NADPH oxidase recruitment in

434 TMZ-treated *Atg5* cKO macrophages, yet, TMZ failed to kill Mtb in the absence of xenophagy,  
435 arguing against direct antimycobacterial activity of the NADPH oxidase. The lack of direct activity  
436 is consistent with other recent studies (Köster et al., 2017; Olive et al., 2018), and likely reflects  
437 that Mtb has ROS-detoxifying activities such as KatG, a catalase/oxidase. We conclude that the  
438 antimycobacterial activity of ROS is primarily based upon its ability to activate lysosomal  
439 trafficking pathways, perhaps due to damage to the phagosomal membrane resulting in xenophagy  
440 activation.

441

442 While, the current view is that ROS generation contributes to inflammation and cellular damage,  
443 a beneficial role of RET-ROS was appreciated recently for hypoxia sensing in the carotid body  
444 (Fernández-Agüera et al., 2015), ischemia-reperfusion injury (Chouchani et al., 2014), and  
445 extending fly lifespan (Scialò et al., 2016). A number of studies propose the use of FAO inhibitors  
446 as metabolic therapy in cancer (Duman et al., 2019; Wang et al., 2018) and heart failure (Lionetti  
447 et al., 2011). Given the link that we have shown between FAO inhibition and mitoROS, it will be  
448 important to establish whether that contributes to their therapeutic effects. TMZ, which has been  
449 used to treat angina for 35 years, is orally bioavailable, lacks substantial drug-drug interactions,  
450 and has a favorable safety profile (Dézsi, 2016). Importantly, TMZ showed antimycobacterial  
451 activity in mice at drug concentrations that are used clinically. Therefore, TMZ could be rapidly  
452 translated into an HDT to be used as an adjunct to conventional antibiotics. The magnitude of Mtb  
453 control was modest, but similar to other HDTs that have been tested in mouse models of Mtb  
454 (Napier et al., 2011; Parihar et al., 2014; Singhal et al., 2014). In the case of TMZ, the limited  
455 activity is probably not due to inadequate drug exposure, but may reflect that TMZ works in only  
456 certain myeloid cells *in vivo*, perhaps based upon their metabolic phenotype, or that there is limited

457 capacity of mitoROS or autophagy to activate robust clearance. Distinguishing these possibilities  
458 will be important in terms of designing effective HDTs for clinical use. Evaluating the effect of  
459 TMZ on other cell types critical for Mtb infection, including neutrophils, dendritic cells, and T  
460 cells will be important. Many of the leading candidates for HDT, such as metformin and sirtuin-1,  
461 also promote autophagy (Cheng et al., 2017; Singhal et al., 2014), and whether enhanced  
462 antimicrobial control could be established by a combination of HDTs that target distinct cellular  
463 reservoirs or work synergistically to activate antimicrobial pathways will be critical to investigate.

464

#### 465 **ACKNOWLEDGEMENTS**

466 We thank members of the Philips laboratory and Robert Mahon (NIH/NIAID) for critical reading  
467 of the manuscript. We thank Ronald E. Dolle (Washington University in St. Louis (WUSTL)) for  
468 help designing PK studies, Michael J. Wolfgang (Johns Hopkins University School of Medicine)  
469 for providing *Cpt2<sup>fl/fl</sup>* mice, and Jeff Cox (University of California, Berkeley) for providing Rv-lux  
470 strain. We thank the Alvin J. Siteman Cancer Center (WUSTL), Barnes-Jewish Hospital in St  
471 Louis, MO, the Bursky Center for Human Immunology and Immunotherapy Programs  
472 Immunomonitoring Laboratory, and Diane Bender for the multiplexing immunoassay service. The  
473 Siteman Cancer Center is supported in part by an NCI Cancer Center Support Grant #P30  
474 CA091842. This work was supported by grants from the NIH (R21 AI128427), the Center for  
475 Drug Discovery (WUSTL), and LEAP Inventor Challenge Award (WUSTL) to J.A.P, NIH (R35  
476 HL135799) to K.J.M., NIH (R01 DK11003404) to J.D.S., and the Pott's Memorial Foundation to  
477 P.C.

478

479 **AUTHOR CONTRIBUTIONS**

480 M.O. and S.K. did experiments demonstrating activity of etomoxir against intracellular Mtb and  
481 P.C. performed all subsequent experiments. She had help with mice and MIC measurements from  
482 G. Y. and SeaHorse experiments by L.H. M.Z., H.W., and V.D. measured TMZ concentrations  
483 from serum of infected mice. J.A.P. conceived the project and supervised the experiments with  
484 input from J.D.S. P.C. and J.A.P. wrote the manuscript; P.C., S.K., M.O., K.J.M., V.D., J.D.S,  
485 and J.A.P. edited the manuscript.

486

487 **DECLARATION OF INTERESTS**

488 The authors declare no competing interests.

489

490

491

492

493

494

495

496

497

498

499 **STAR Methods**

500 **KEY RESOURCES TABLE**

| <b>REAGENT or RESOURCE</b>                                     | <b>SOURCE</b>            | <b>IDENTIFIER</b>     |
|----------------------------------------------------------------|--------------------------|-----------------------|
| <b>Antibodies</b>                                              |                          |                       |
| gp91 phox antibody                                             | Abcam                    | Cat# ab80508          |
| p40-phox (N-20-R) antibody                                     | Santa Cruz Biotechnology | Cat# sc-18252-R       |
| Human/Mouse/Rat p62/SQSTM1 Alexa Fluor 488 conjugated antibody | R&D systems              | Cat# IC8028G          |
| Alexa Fluor 488 goat and rabbit IgG(H+L)                       | Thermo Fisher Scientific | Cat#A11034            |
| <b>Chemicals and Inhibitors</b>                                |                          |                       |
| Etomoxir                                                       | Tocris Bioscience        | Cat# 4539             |
| Trimetazidine                                                  | Cayman Chemical Company  | Cat# 18165            |
| Oxfenicine                                                     | Sigma Aldrich            | Cat# 56160-10G        |
| Metformin                                                      | Sigma Aldrich            | Cat# D150959-5G       |
| mitoTEMPO                                                      | Sigma Aldrich            | Cat# SML0737-5MG      |
| Amikacin                                                       | Sigma Aldrich            | Cat# A1774            |
| BODIPY 493/503                                                 | Thermo Fisher Scientific | Cat# D3922            |
| Calcein AM cell permeant dye                                   | Thermo Fisher Scientific | Cat# C1430            |
| Diphenyleneiodonium chloride (DPI)                             | Sigma Aldrich            | Cat# D2926-10MG       |
| Tert-Butyl hydroperoxide (tBHP)                                | Sigma Aldrich            | Cat# 416665-100ML     |
| N-acetyl L-cysteine (NAC)                                      | Sigma Aldrich            | Cat# A7250-5G         |
| Rotenone                                                       | Sigma Aldrich            | Cat#R8875             |
| Antimycin                                                      | Sigma Aldrich            | Cat#A8674             |
| Menadione                                                      | Sigma Aldrich            | Cat# M5625            |
| Oligomycin                                                     | Sigma Aldrich            | Cat#C2920             |
| FCCP                                                           | Sigma Aldrich            | Cat# P8139            |
| Phorbol 12-myristate 13-acetate (PMA)                          | Sigma Aldrich            | Cat# P8139            |
| CellRox Green Reagent                                          | Thermo Fisher Scientific | Cat# C10444           |
| MitoSox Red mitochondrial superoxide indicator                 | Thermo Fisher Scientific | Cat# M36008           |
| <b>Deposited Data</b>                                          |                          |                       |
| N/A                                                            |                          |                       |
| <b>Commercial Assays</b>                                       |                          |                       |
| Milliplex MAP Mouse Cytokine/Chemokine Magnetic Bead Panel     | EMD-Millipore            | Cat# MCYTOMAG-70K     |
| IFN-alpha/IFN-beta 2-plex Mouse ProcartaPlex Panel             | Thermo Fisher Scientific | Cat# EPX02A-22187-901 |
| <b>Software and Algorithms</b>                                 |                          |                       |
| GraphPad Prism                                                 |                          | www.graphpad.com      |

|                                         |                          |               |
|-----------------------------------------|--------------------------|---------------|
| NIS Elements version 4.40               | Nikon, Inc               |               |
| <b>Culture supplies and supplements</b> |                          |               |
| Dulbecco's Modified Eagle Medium (DMEM) | Thermo Fisher Scientific | Cat# 11995065 |
| RPMI 1640 Medium                        | Thermo Fisher Scientific | Cat# 11875093 |
| Fetal bovine serum (FBS)                | Thermo Fisher Scientific | Cat# 26140079 |
| BD Difco Middlebrook 7H9 Broth          | BD Biosciences           | Cat# 271310   |
| BD BBL Middlebrook ADC Enrichment       | BD Biosciences           | Cat# 212352   |
| BD Difco Middlebrook 7H11 Agar          | BD Biosciences           | Cat# 283810   |
| BD BBL Middlebrook OADC Enrichment      | BD Biosciences           | Cat# 212351   |

501

## 502 LEAD CONTACT AND MATERIALS AVAILABILITY

503 Further information and requests for reagents may be directed to and will be fulfilled by the Lead  
504 Contact, J. A. Philips ([philips.j.a@wustl.edu](mailto:philips.j.a@wustl.edu))

505

## 506 EXPERIMENTAL MODEL DETAILS

### 507 Bacterial Strains

508 *M. tuberculosis* and *M. abscessus* were grown at 37°C to log phase in Middlebrook 7H9 broth (BD  
509 Biosciences) supplemented with 0.05% Tween 80, BD BBL Middlebrook ADC Enrichment (BD  
510 Biosciences), and 0.2% (vol/vol) glycerol. Plasmids were selected with 25 µg/ml kanamycin or 50  
511 µg/ml hygromycin depending on the resistance marker. H37Rv, the wild type Mtb strain, and  
512  $\Delta$ esxA were provided by William Jacobs Jr. (Albert Einstein College of Medicine)(Wong and  
513 Jacobs, 2011). DsRed expressing H37Rv was a gift from J. Ernst (New York University). H37Rv  
514 expressing the *Vibrio harvei* luciferase (Rv-lux) was gift from Jeff Cox (University of California,  
515 Berkeley). The “live-dead” reporter strain constitutively expresses mCherry and inducibly express  
516 GFP under control of a tetracycline-inducible promoter (Martin et al., 2012).

517



## 518 **Mice**

519 We used 8-12 week old C57BL/6 mice. *Cpt2<sup>fl/fl</sup>* LysM-Cre<sup>+</sup> mice were generated by crossing  
520 *Cpt2<sup>fl/fl</sup>* and LysM-Cre<sup>+</sup> mice. The generation of *Cpt2<sup>fl/fl</sup>* and LysM-Cre<sup>+</sup> mice have been described  
521 previously (Clausen et al., 1999; Lee et al., 2015). The Washington University School of Medicine  
522 Institutional Animal Care and Use Committee approved all the work with mice. Euthanasia was  
523 performed prior to bone marrow harvest in accordance with the 2013 *AVMA Guidelines for the*  
524 *Euthanasia of Animals* (<https://www.avma.org/KB/Policies/Documents/euthanasia.pdf>).

525

## 526 **METHOD DETAILS**

### 527 **Cell culture**

528 To obtain murine bone marrow-derived macrophages (BMDMs), marrow was flushed from the  
529 femurs and tibia of mice, and the hematopoietic stem cells were allowed to differentiate for 7 days  
530 in Dulbecco's Modified Eagle Medium (DMEM, Gibco) supplemented with 10% fetal bovine  
531 serum (FBS, Gibco), 1% Pen-Strep solution (Gibco), and 20% L929-conditioned medium. After  
532 7 days, the BMDMs were harvested using Ca<sup>2+</sup>/Mg<sup>2+</sup>-free PBS (Gibco) containing 5mM EDTA  
533 (Invitrogen, Life Technologies), and maintained in DMEM containing 10% FBS and 10% L929-  
534 conditioned medium after infection. Immortalized BMDMs (iBMDMs) were immortalized by  
535 infection with the J2 retrovirus (BEI Resources). RAW 264.7 and THP-1 cells were obtained from  
536 American Type Tissue Collection (ATCC) and were maintained in DMEM and RPMI-1640,  
537 respectively, with 10%FBS. THP-1 differentiation was induced using 20 ng/ml phorbol-12-  
538 myristate acetate (PMA, Sigma) for 18-20 hours.

539

540 **Bacterial infections**

541 For *in vitro* macrophage assays, a log phase culture of Mtb H37Rv was pelleted and resuspended  
542 in macrophage culture medium. Bacterial single-cell suspensions were prepared by filtering  
543 through 5-micron filters (PALL Life Sciences, catalog no. 4650). The number of Mtb in the  
544 resultant filtrate was estimated by measuring absorbance at 600 nm, followed by infection of  
545 macrophages at a multiplicity of infection (MOI) of 5. After 4 hours, macrophages were washed  
546 three times with warm DMEM to remove extracellular bacteria, and then resuspended in medium  
547 containing FAO inhibitors or solvent control. To estimate intracellular Mtb growth, infected  
548 macrophages were lysed in 0.06% SDS solution at the indicated time points, and serial dilutions  
549 of the lysates were plated on 7H11 agar plates (BD Biosciences, catalog no. 283810) containing  
550 BD BBL Middlebrook OADC Enrichment (BD Biosciences, catalog no. 212351) and glycerol.  
551 Colony forming units (CFU) were calculated 14-21 days later. For *in vivo* infections, log phase  
552 H37Rv culture was pelleted and resuspended in sterile 0.5% Tween 80 solution. After a  
553 centrifugation step, the supernatant was used for aerosol infection using a Glas-Col inhalation  
554 exposure system. The infectious dose administered was calculated by plating CFU from an aliquot  
555 of the bacterial suspension.

556

557 **Mice surgeries and aerosol infections**

558 Alzet mini-osmotic pumps (Model 2002, Durect Corporation, CA) were loaded with saline or TMZ  
559 solution as per the manufacturer's protocol. The osmotic pumps were surgically implanted in  
560 anesthetized mice under aseptic conditions. The mice were administered analgesic to minimize  
561 pain and were monitored regularly for signs of pain and other postoperative complications. Two  
562 days later, the mice were infected with H37Rv via aerosol route using an inhalation exposure

563 system from Glas-Col. The dose of infection was confirmed one day post-infection by plating  
564 whole lung homogenates from 2 mice on Middlebrook 7H11 agar. 2 weeks post infection, the mice  
565 were euthanized and the lungs were harvested, homogenized, and plated for CFUs.

566

#### 567 **Serum microsampling of TMZ**

568 Serum concentrations of TMZ in mice were determined at 5 and 14 days after initiating treatment.  
569 Lidocaine was applied to mice tails to minimize pain, and the end of the tail was wiped with alcohol  
570 and a small incision was made. 100  $\mu$ l blood was collected in K<sub>2</sub>-EDTA microvette tubes  
571 (Braintree Scientific, Inc) and was centrifuged at 5,000 rpm for 5 minutes to recover plasma.  
572 Samples were stored at – 80°C until analyzed for TMZ content.

573

#### 574 **High pressure liquid chromatography coupled to tandem mass spectrometry (LC/MS-MS)** 575 **analytical method**

576 1 mg/mL DMSO stocks of Trimetazidine (Sigma-Aldrich) were serial diluted in 50/50 Acetonitrile  
577 water and subsequently serial diluted in drug free CD1 mouse plasma (K<sub>2</sub>EDTA, Bioreclamation  
578 IVT, NY) to create standard curves and quality control (QC) spiking solutions. Standards, QC,  
579 controls, and study samples were extracted by combining 10  $\mu$ L plasma with 100  $\mu$ L  
580 acetonitrile/methanol 50/50 containing the internal standard verapamil. Extracts were vortexed  
581 and centrifuged, and supernatant was transferred for LC-MS/MS analysis. LC/MS-MS was  
582 performed on a Sciex Applied Biosystems Qtrap 6500+ triple-quadrupole mass spectrometer  
583 coupled to a Shimadzu 30ACMP HPLC system, and chromatography was performed on an Agilent  
584 Zorbax XDB-C<sub>18</sub> column (3x75 mm; particle size, 3.5  $\mu$ m). Milli-Q deionized water with 0.1%

585 formic acid was used for the aqueous mobile phase and 0.1% formic acid in acetonitrile for the  
586 organic mobile phase. Multiple-reaction monitoring (MRM) of parent/daughter transitions in  
587 electrospray positive-ionization mode was used to quantify all molecules. MRM transitions of  
588 267.08/181.10 and 455.40/165.20 were used for TMZ and Verapamil respectively.

589

### 590 **Fluorescence microscopy and image analyses**

591 BMDMs were seeded in 8-well chamber slides (Falcon culture slide 8-well, catalog no. 08-774-  
592 26), and infected with DsRed-expressing H37Rv at MOI 5. At the indicated time points, samples  
593 were fixed overnight with 1% paraformaldehyde (PFA). For immunofluorescence (IF), samples  
594 were permeabilized and blocked in PBS with 0.05% saponin and 3% BSA, and stained with the  
595 indicated primary antibodies for 2 h at room temperature or overnight at 4°C. Primary antibodies  
596 used were p40<sup>phox</sup> (Santa Cruz Biotechnologies), gp91<sup>phox</sup>/NOX2 (abcam), and p62 (R&D  
597 systems). Staining with alexa fluorophore-conjugated secondary antibody (Molecular Probes) was  
598 done for 2 h at room temperature. Following this, the samples were washed with 0.1% Tween  
599 20/PBS and mounted using Prolong Gold antifade (Thermo Fisher Scientific, catalog no. P36930).

600 Images were captured using a Nikon Eclipse Ti confocal microscope (Nikon Instruments Inc.)  
601 equipped with a 60X apochromat oil-objective lens, and analyzed using NIS-Elements version  
602 4.40 (Nikon). Briefly, a region of interest (ROI) was drawn around each bacterium and the mean  
603 fluorescence intensity (MFI) was measured using the ROI statistics tool.

604

### 605 **ROS measurement assays**

606 For ROS measurement assays, the macrophages were seeded in 96 well plates ( $\mu$ -Plate 96 well,  
607 IBIDI catalog no. 89626). To estimate total cell ROS, the samples were treated with Cell Rox  
608 green fluorescent dye (Thermo Fisher Scientific) at 5  $\mu$ M for 30 minutes. The samples were  
609 washed three times with PBS, and fixed overnight with 1% PFA. Mitochondrial ROS was  
610 measured in live, uninfected macrophages using MitoSox fluorescent dye (Thermo Fisher  
611 Scientific), at 5 $\mu$ M for 30 minutes. The samples were imaged using confocal microscope, and the  
612 ROS signal of each cell was quantified using NIS-Elements software. Briefly, each cell was  
613 converted to a ROI and the MFI was measured using the ROI statistics tool.

614

#### 615 **Oxygen consumption rate and extracellular acidification rate**

616 BMDMs from *Cpt2* cKO mice and control littermates were plated in 96 well Seahorse plates at a  
617 density of 75,000 cells per well. The cells were treated with 5nM TMZ or solvent control for 3 h.  
618 After treatment, the cells were washed and placed in XF media (non-buffered RPMI 1640  
619 containing 25mM glucose, 2mM L-glutamine and 1mM sodium pyruvate) with 10 % FCS. Oxygen  
620 consumption rate (OCR) and extracellular acidification rates (ECAR) were measured under basal  
621 conditions and following inhibitors were added: 1 $\mu$ M oligomycin (Sigma), 1.5 $\mu$ M fluorocarbonyl  
622 cyanide phenylhydrazone (FCCP, Sigma), and 100 nM rotenone (Sigma) + 1 $\mu$ M antimycin A  
623 (Sigma). Measurements were taken using a 96 well Extracellular Flux Analyzer (Seahorse  
624 Bioscience, North Bellerica, MA, USA).

625

#### 626 **Metabolomics**

627 For metabolic profiling of murine BMDMs, 15 million macrophages were seeded in 15 cm petri  
628 dishes (Genesee Scientific) with 5 replicates for each condition. The next day, macrophages were  
629 infected with H37Rv at an MOI 5 for 4 h as described above. The samples were washed and  
630 maintained in culture medium with or without with 50 nM TMZ for 3 or 24 h. At the respective  
631 time points, the samples were washed twice with sterile Hank's Balanced Salt Solution (HBSS,  
632 Gibco), and the metabolites were extracted in 80% methanol (Sigma) in water (Corning). The  
633 samples were stored at -80° C and shipped to Metabolon Inc., NC ([www.metabolon.com](http://www.metabolon.com)) for  
634 further processing and analyses.

635 At Metabolon, the samples were prepared using the automated MicroLab STAR<sup>®</sup> system from  
636 Hamilton Company. After addition of recovery standards and protein removal, the extracts were  
637 divided into fractions for analysis by: two separate reverse phase (RP)/ UPLC-MS/MS with  
638 positive ion mode electrospray ionization (ESI), RP/UPLC-MS/MS with negative ion mode (ESI),  
639 and HILIC/UPLC-MS/MS with negative ion mode ESI. All methods utilized a Waters ACQUITY  
640 ultra-performance liquid chromatography (UPLC) and a Thermo Scientific Q-Exactive high  
641 resolution/accurate mass spectrometer interfaced with a heated electrospray ionization (HESI-II)  
642 source and Orbitrap mass analyzer operated at 35,000 mass resolution.

643

#### 644 **Cytokine measurements**

645 Culture supernatants were harvested from uninfected or Mtb-infected BMDMs that were untreated  
646 or treated with 5 or 50 nM TMZ for 24 and 72 h. The conditioned media was filter-sterilized and  
647 cytokines and chemokines were measured using Milliplex MAP Mouse Cytokine/Chemokine  
648 Magnetic Bead Panel (MCYTOMAG-70K, Millipore Sigma) and Procartaplex Mouse IFN $\alpha$ /IFN $\beta$   
649 Panel (2plex) (ThermoFisher Scientific).

650

### 651 **Liquid MIC determinations**

652 In 96 well plates, Mtb cultures with starting OD<sub>600</sub> of 0.01, 0.05, and 0.10 were incubated with  
653 increasing concentrations of drugs in triplicate. The growth of Mtb was measured at day 0, 1, 2, 3  
654 and 4. The MIC was considered the minimal concentration tested that inhibited Mtb growth at 4  
655 days. To assess the direct toxicity of TMZ on Mtb, H37Rv expressing the *Vibrio harvei* luciferase  
656 (Rv-lux) was cultured in 7H9 broth with or without 1 mM TMZ for 7 days. Relative luminescence  
657 units (RLU) were measured every 2 days at 490 nm.

658

### 659 **PK studies**

660 PK and plasma binding studies were performed by Alliance Pharma (PA, USA) following IV and  
661 oral administration of 3 and 15 mg/kg TMZ, respectively. PK study of TMZ using Alzet osmotic  
662 pumps was conducted by Paraza Pharma Inc, Canada. Briefly, Alzet osmotic pumps (model 2002,  
663 Durect Corporation) were surgically implanted in C57BL/6 mice (n=5) for a subcutaneous infusion  
664 at 10.66 m/kg/day. Plasma TMZ concentrations were determined over the course of 48h.

665

### 666 **Statistics**

667 GraphPad Prism software was used to prepare plots and assess statistical significance of results  
668 using unpaired Student's t-test with Welch's correction, Ordinary one-way ANOVA and Mann-  
669 Whitney test.

670

671

672 **FIGURE LEGENDS**

673 **Figure 1. Inhibition of macrophage FAO restricts intracellular Mtb growth.**

674 **(A)** In the carnitine shuttle, long chain fatty acids that have been activated to acyl-CoA derivatives  
675 are converted to acylcarnitines by CPT1 at the outer mitochondrial membrane. Etomoxir and  
676 oxfenicine inhibit CPT1. Acylcarnitines are transported across the mitochondrial membrane by a  
677 dedicated translocase. In the mitochondria, CPT2 converts acylcarnitines back to acyl-CoA and  
678 carnitine. Acyl-CoA chains then undergo  $\beta$ -oxidation, successively generating acetyl-CoA that  
679 enters the TCA cycle. Trimetazidine inhibits 3-ketoacyl-CoA thiolase, which catalyzes the release  
680 of acetyl-CoA from the acyl-CoA chain. **(B-D)** Survival of Mtb (H37Rv) in BMDMs that were  
681 untreated or treated for 72 h with 2 mM metformin (MET) or indicated concentrations of ETM  
682 **(B)**, TMZ **(C)**, or OXF **(D)**. **(E)** Survival of Mtb in BMDMs from *Cpt2* KO (*Cpt2<sup>fl/fl</sup>LysM-Cre<sup>+</sup>*)  
683 and littermate controls (*Cpt2<sup>fl/fl</sup> Cre<sup>-</sup>*, WT) 4, 72 and 120 hpi. **(F)** Survival of Mtb in BMDMs from  
684 *Cpt2* cKO and WT controls treated with ETM, TMZ, or vehicle control for 72h. CFU are expressed  
685 as % of WT untreated control. **(G)** PMA-differentiated THP-1 cells were infected with Mtb and  
686 treated with ETM or TMZ for 72 hpi prior to enumerating CFU. **(B-G)** Data shows mean +/- s.e.m.  
687 from one representative experiment from at least 2 independent experiments. \*\*P  $\leq$  0.009,  
688 \*\*\*P=0.0003, \*\*\*\*P<0.0001, NS- not significant, one-way ANOVA **(B-D, F-G)** or unpaired  
689 Students t-test with Welch's correction **(E)**. See also **Figure S1**.

690

691 **Figure 2. FAO inhibition restricts growth of Mtb *in vivo***

692 **(A)** *Cpt2* cKO mice and littermate controls were infected by aerosol with 100-200 Mtb CFU per  
693 animal, and CFU were enumerated from lungs 7 days post-infection. \*P=0.04, **(B-D)** Efficacy of  
694 TMZ treatment was tested in mice that were acutely infected with Mtb. Plots show total lung and



695 spleen CFU for the first study (B, C) and total lung CFU for the second study (D) after 2 weeks of  
696 TMZ treatment. \*P=0.03, \*\*P=0.02, \*\*\*P=0.0002. (E) Serum levels of TMZ were measured at  
697 the end of therapy in mice shown in (D). (F,G) In the chronic study, mice that were infected by  
698 aerosol with Mtb for five weeks were treated with TMZ or saline control for 2 weeks (shown in  
699 gray region) and total lung and spleen CFU were enumerated. \*P=0.01, \*\*P≤0.005, \*\*\*P=0.0002.  
700 (H) Serum levels of TMZ were measured in mice shown in (F) after 5 days of starting treatment  
701 (▲) and at the end of therapy (○). Data shows mean +/- s.e.m., P-values calculated using Mann-  
702 Whitney rank sum test. See also **Figure S2**.

703

704 **Figure 3. FAO inhibition enhances metabolic changes in response to Mtb infection.**

705 (A) Global metabolite profiling was performed on uninfected or Mtb infected BMDMs to assess  
706 the effect of infection alone or after treatment with 50nM TMZ for 3 or 24 h. (B) Macrophage  
707 glycolysis was augmented in response to Mtb infection, and a sharp accumulation in glycolytic  
708 intermediates was observed. Glucose-6-phosphate was shunted to the pentose phosphate pathway  
709 for the production of PRPP and sedoheptulose-6-phosphate. The pathway heat map shows  
710 metabolite ratios in Mtb infected and uninfected (TB/Ctrl) macrophages, that were untreated  
711 (None) or TMZ treated (Drug) for 3 or 24 h. Here, significant difference ( $p \leq 0.05$ , three-way  
712 ANOVA) between groups are colored in green for metabolite ratio of  $< 1$  and red for ratio of  $> 1$ .  
713 Light green and red colors show groups that narrowly missed statistical cutoff for significance  
714  $0.05 < p < 0.10$ . (C) Mtb infection induced levels of intermediates itaconate and succinate. This  
715 reflected breakpoints in the TCA cycle that are characteristic of inflammatory macrophage  
716 phenotype. Innate immune response of macrophage against the pathogen manifested as elevations  
717 in (D) citrulline, an iNOS by product, and (E) oxidized glutathione, a host redox metabolite. (C-

718 E) Graphs show ScaledImpData of different biochemicals in uninfected (UI) and infected (TB)  
719 samples at the indicated time points. The line and dot show data median and mean, respectively.

720 See also **Figure S3**.

721

722 **Figure 4. FAO inhibition induces mitochondrial ROS burst required for Mtb killing.**

723 CellRox mean fluorescence intensity (MFI) of (A) uninfected iBMDMs that were untreated or  
724 treated with 500nM TMZ for 3h, alone or in presence of mitoTEMPO (10 $\mu$ M) or DPI (10mM),  
725 (B) uninfected and infected BMDMs with or without mitoTEMPO (10 $\mu$ M) 4hpi, (C) Mtb-infected  
726 Wt and *Nox2* KO BMDMs that were untreated or treated with 5nM TMZ for 3h, and (D) Mtb-  
727 infected *Cpt2* cKO and control BMDMs 24 hpi that were untreated or treated with N-acetyl  
728 cysteine (NAC, 10mM). tert-Butyl hydroperoxide (tBHP, 0.25mM, 30 mins) was used as a positive  
729 control. \*P=0.02, \*\*P=0.001, \*\*\*\*P<0.0001, NS- not significant, calculated using unpaired  
730 Student's t-test with Welch's correction (A) and ordinary one-way ANOVA (B-D). (E) MitoSox  
731 MFI of uninfected BMDMs that were untreated or treated with 500nM TMZ for 3h, alone or in  
732 presence of rotenone (10 $\mu$ M, 30mins). \*P=0.02, \*\*\*\*P $\leq$ 0.0001, ordinary one-way ANOVA. (F)  
733 Mtb CFU in BMDMs that were untreated or treated with 50nM TMZ alone or in combination with  
734 mitoTEMPO for 120 hr. Data from one of 2 independent experiments shows mean +/-  
735 s.e.m.\*\*P=0.005 calculated using unpaired Student's t-test with Welch's correction. (A-E) Data  
736 shown is mean +/- s.e.m. of MFI derived from individual cells in the sample. At least 100 cells  
737 were analyzed from duplicate samples. For (B, E), values are expressed as %uninfected.

738 See also **Figure S4**.

739

740 **Figure 5. FAO inhibition promotes NADPH oxidase recruitment on phagosomes.**

741 **(A)** Survival of Mtb in BMDMs from *Nox2* KO and control mice that were untreated or treated  
742 with indicated concentrations of ETM and TMZ, 120 hpi. \*P=0.04, \*\*\*\*P=0.0001, ordinary one-  
743 way ANOVA. **(B)** Immunofluorescence (IF) microscopy of gp91<sup>phox</sup>/NOX2 (green) and dsRed-  
744 expressing H37Rv (red) in BMDMs that were infected and treated with 5nM TMZ or untreated  
745 for 24h. The co-localized region is shown in yellow, scale bar = 10µm. MFI of the NADPH  
746 oxidase subunits **(C)** gp91<sup>phox</sup>/NOX2 and **(D)** p40<sup>phox</sup> co-localized with H37Rv in BMDMs that  
747 were untreated or treated with 5nM TMZ (24hpi). **(E)** MFI of p40<sup>phox</sup> co-localized with Mtb in  
748 BMDMs treated with 5nM TMZ alone or in presence of mitoTEMPO (48 hpi). (C-E) Automated  
749 image analysis was used to quantify gp91<sup>phox</sup>/NOX2 or p40<sup>phox</sup> MFI co-localized with over 100  
750 bacilli in at least 2 independent experiments. Data shows mean +/- s.e.m. of MFI from around  
751 individual bacilli in the sample. \*P=0.02, \*\*\*\*P≤0.0001 calculated using unpaired Student's t-test  
752 with Welch's correction (C-D) or ordinary one-way ANOVA (E).

753

754 **Figure 6. Antimicrobial activity of FAO inhibitors depends on autophagy.**

755 **(A)** Survival of Mtb was compared in FAO inhibitor treated control and *Atg5* cKO macrophages,  
756 72hpi. **(B)** CellRox MFI in Mtb infected control and *Atg5* cKO BMDMs after TMZ treatment (5  
757 nM, 3hr), with or without mitoTEMPO. \*\*\*\*P≤0.0001, unpaired Student's t-test with Welch's  
758 correction. Survival of Mtb in BMDMs from control and **(C)** *Atg14l* cKO cells 72 hpi, and **(D)**  
759 *Parkin2* KO cells 120 hpi. Data shows mean +/- s.e.m. \*P=0.04, using unpaired t-test with Welch's  
760 correction in (A) or \*\*\*P=0.0002, \*\*\*\*P≤0.0001 using ordinary one-way ANOVA in (C, D). **(E)**  
761 IF microscopy of p62 (green) and dsRed-expressing H37Rv (red) in BMDMs treated with 5nM  
762 TMZ 24hpi. The co-localized region is shown in yellow, scale bar = 10µm. MFI of p62 co-

763 localized with Mtb was measured in BMDMs treated with 5nM TMZ alone or with mitoTEMPO  
764 for **(F)** 3 or **(G)** 24 hours. \*\*\*\* P $\leq$ 0.0001, ordinary one-way ANOVA. **(H)** IF images and **(I)** MFI  
765 of p62 co-localized with Mtb in *Cpt2* KO and control BMDMs 24hpi. **(J)** MFI of p62 co-localized  
766 with  $\Delta esxA$  in BMDMs treated with TMZ for 24h. **(K)** MFI of gp91<sup>phox</sup>/NOX2 co-localized with  
767 Mtb in control versus *Atg5* cKO BMDMs after TMZ treatment (5nM, 24hpi). **(L)** MFI of p62 co-  
768 localized with Mtb in control and Nox2KO macrophages treated with 5nM TMZ with or without  
769 mitoTEMPO, 24 hpi. Data shows mean +/- s.e.m. \*\*P=0.001, \*\*\*\*P $\leq$ 0.0001 calculated using  
770 unpaired Student's t-test with Welch's correction in (K) and ordinary one-way ANOVA for (J,L).  
771 All panels show data from one representative experiment from at least 2 independent replicates.

772

773

774

775

776

777

778

779

780

781

782

783

## Figure 1

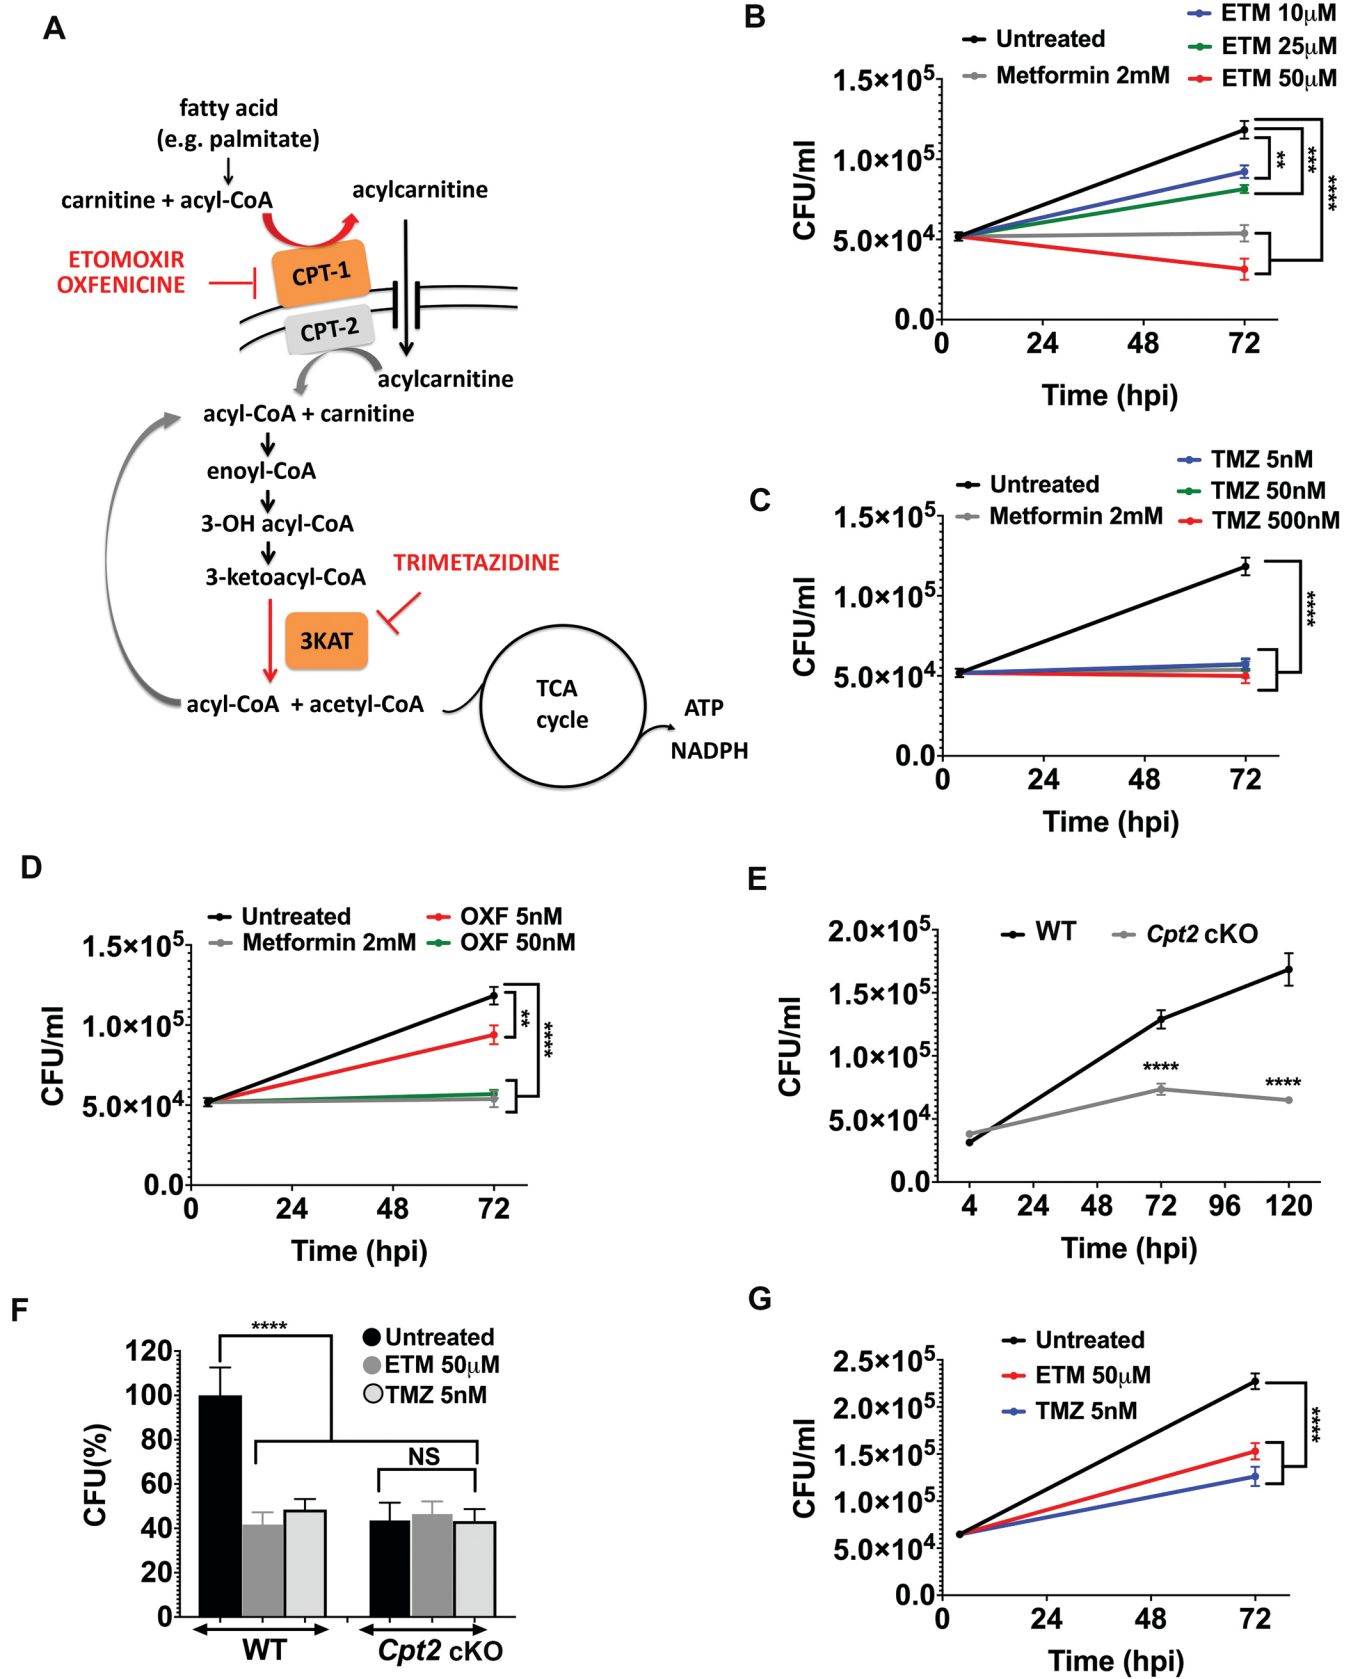

**Figure 2**

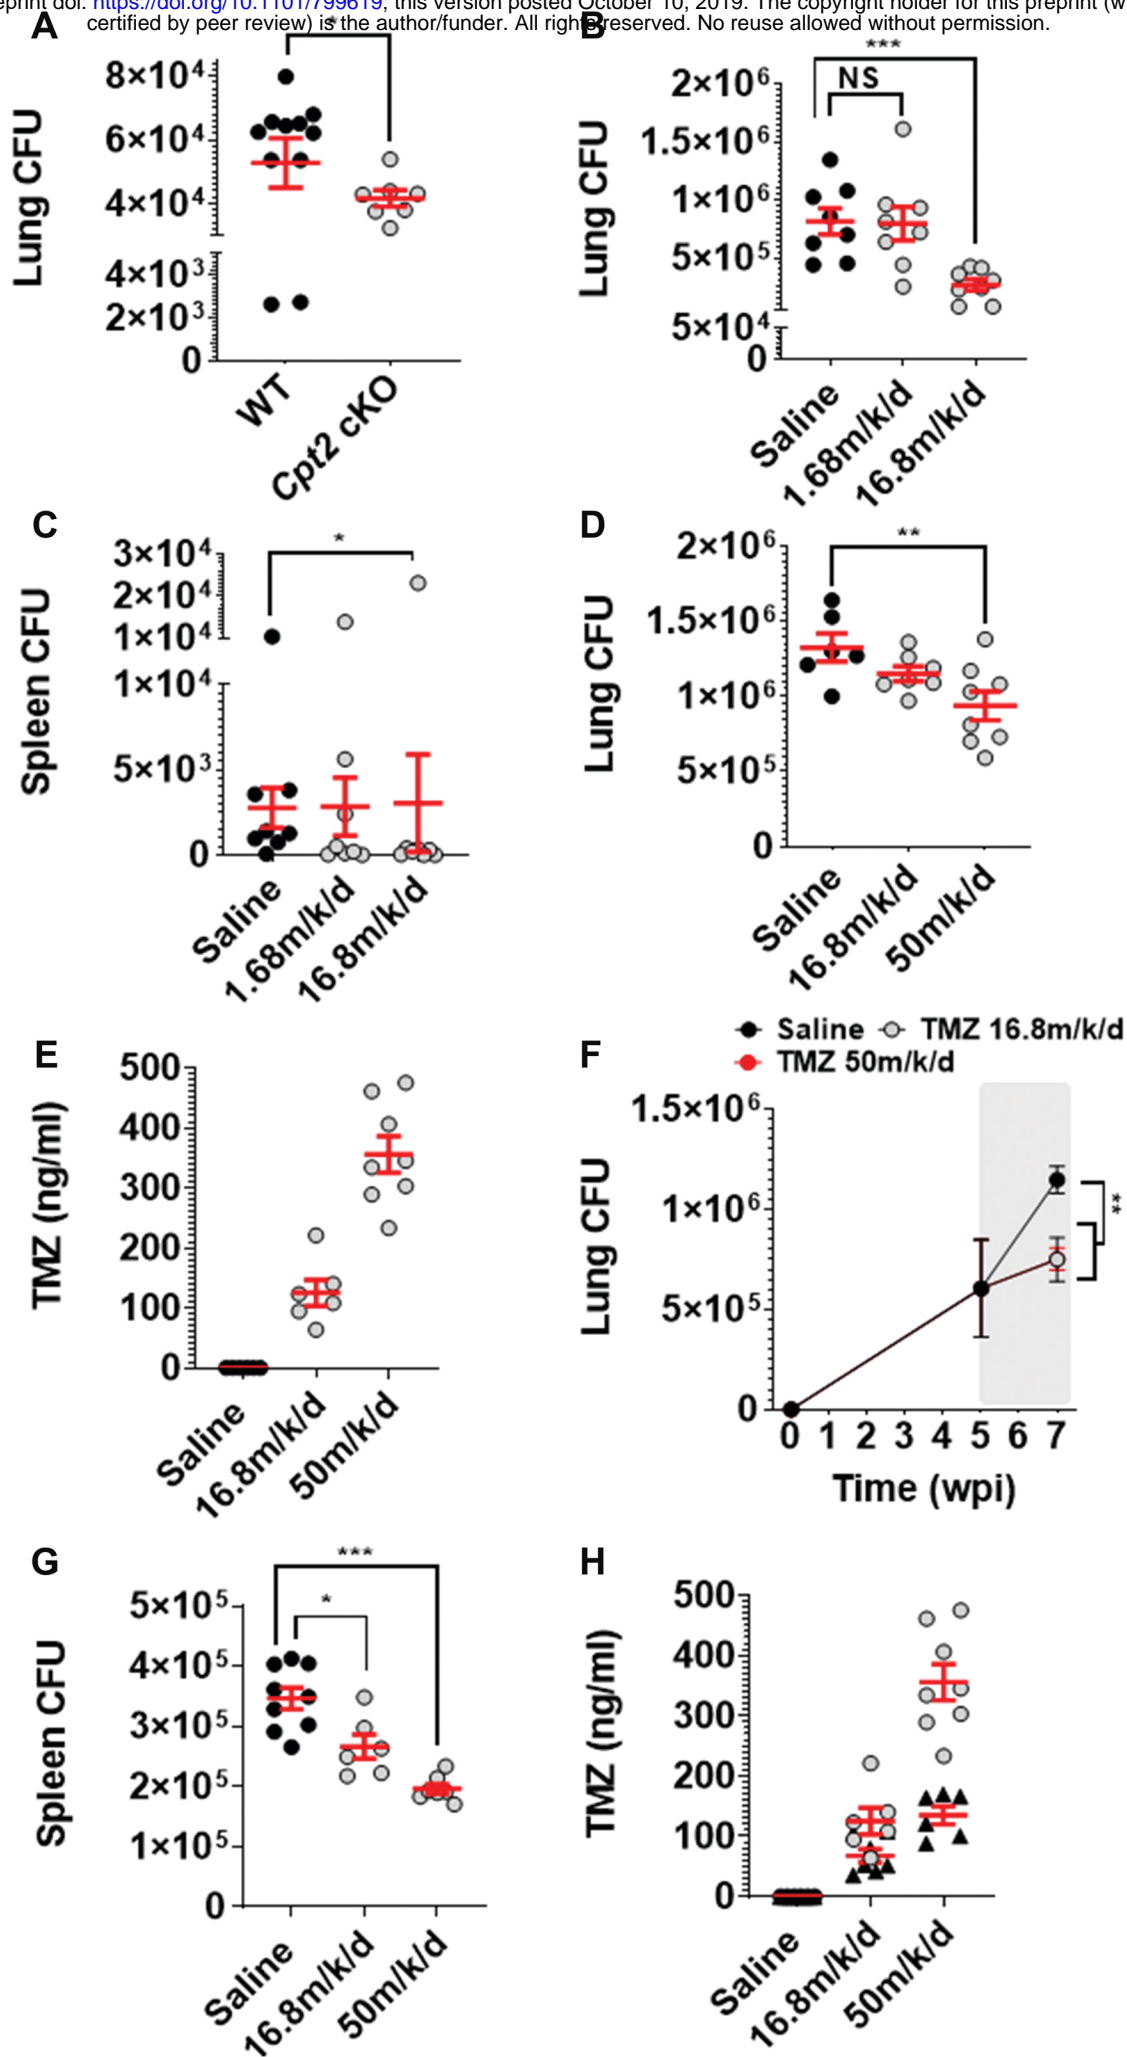

# Figure 3

## A Global metabolite profiling

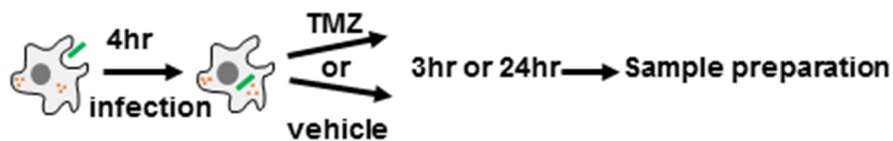

## B

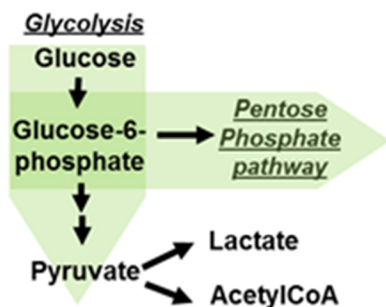

| Sub Pathway                                          | Biochemical Name                                                           | TB Ctrl |      |      |      |
|------------------------------------------------------|----------------------------------------------------------------------------|---------|------|------|------|
|                                                      |                                                                            | None    |      | Drug |      |
|                                                      |                                                                            | 3H      | 24H  | 3H   | 24H  |
| Glycolysis, Gluconeogenesis, and Pyruvate Metabolism | glucose                                                                    | 0.83    | 1.02 | 0.83 | 0.92 |
|                                                      | glucose 6-phosphate                                                        | 1.55    | 1.12 | 1.50 | 1.52 |
|                                                      | fructose 1,6-diphosphate/glucose 1,6-diphosphate/myo-inositol diphosphates | 1.32    | 1.55 | 1.34 | 1.81 |
|                                                      | 3-phosphoglycerate                                                         | 1.20    | 1.20 | 1.20 | 1.39 |
|                                                      | phosphoenolpyruvate (PEP)                                                  | 0.97    | 1.27 | 1.10 | 1.49 |
|                                                      | pyruvate                                                                   | 0.91    | 1.29 | 1.12 | 1.28 |
| Pentose Phosphate Pathway                            | lactate                                                                    | 1.14    | 1.48 | 1.33 | 1.48 |
|                                                      | 5-phosphoribosyl diphosphate (PRPP)                                        | 1.03    | 1.65 | 1.13 | 1.96 |
|                                                      | sedoheptulose-7-phosphate                                                  | 1.26    | 1.43 | 1.27 | 1.79 |

## C

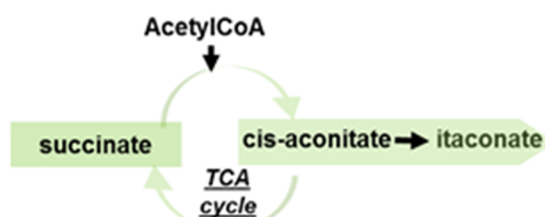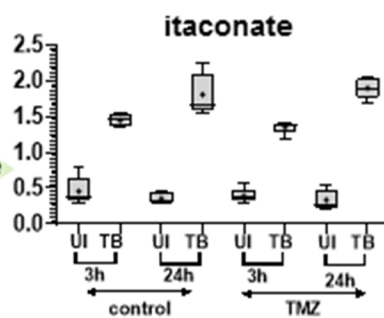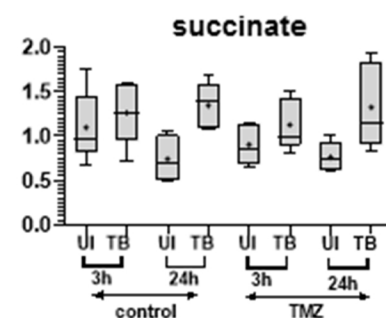

## D

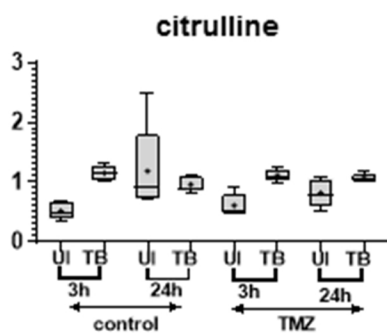

## E

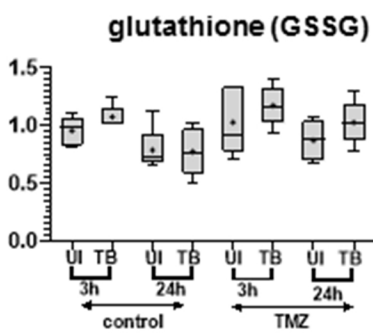

Figure 4

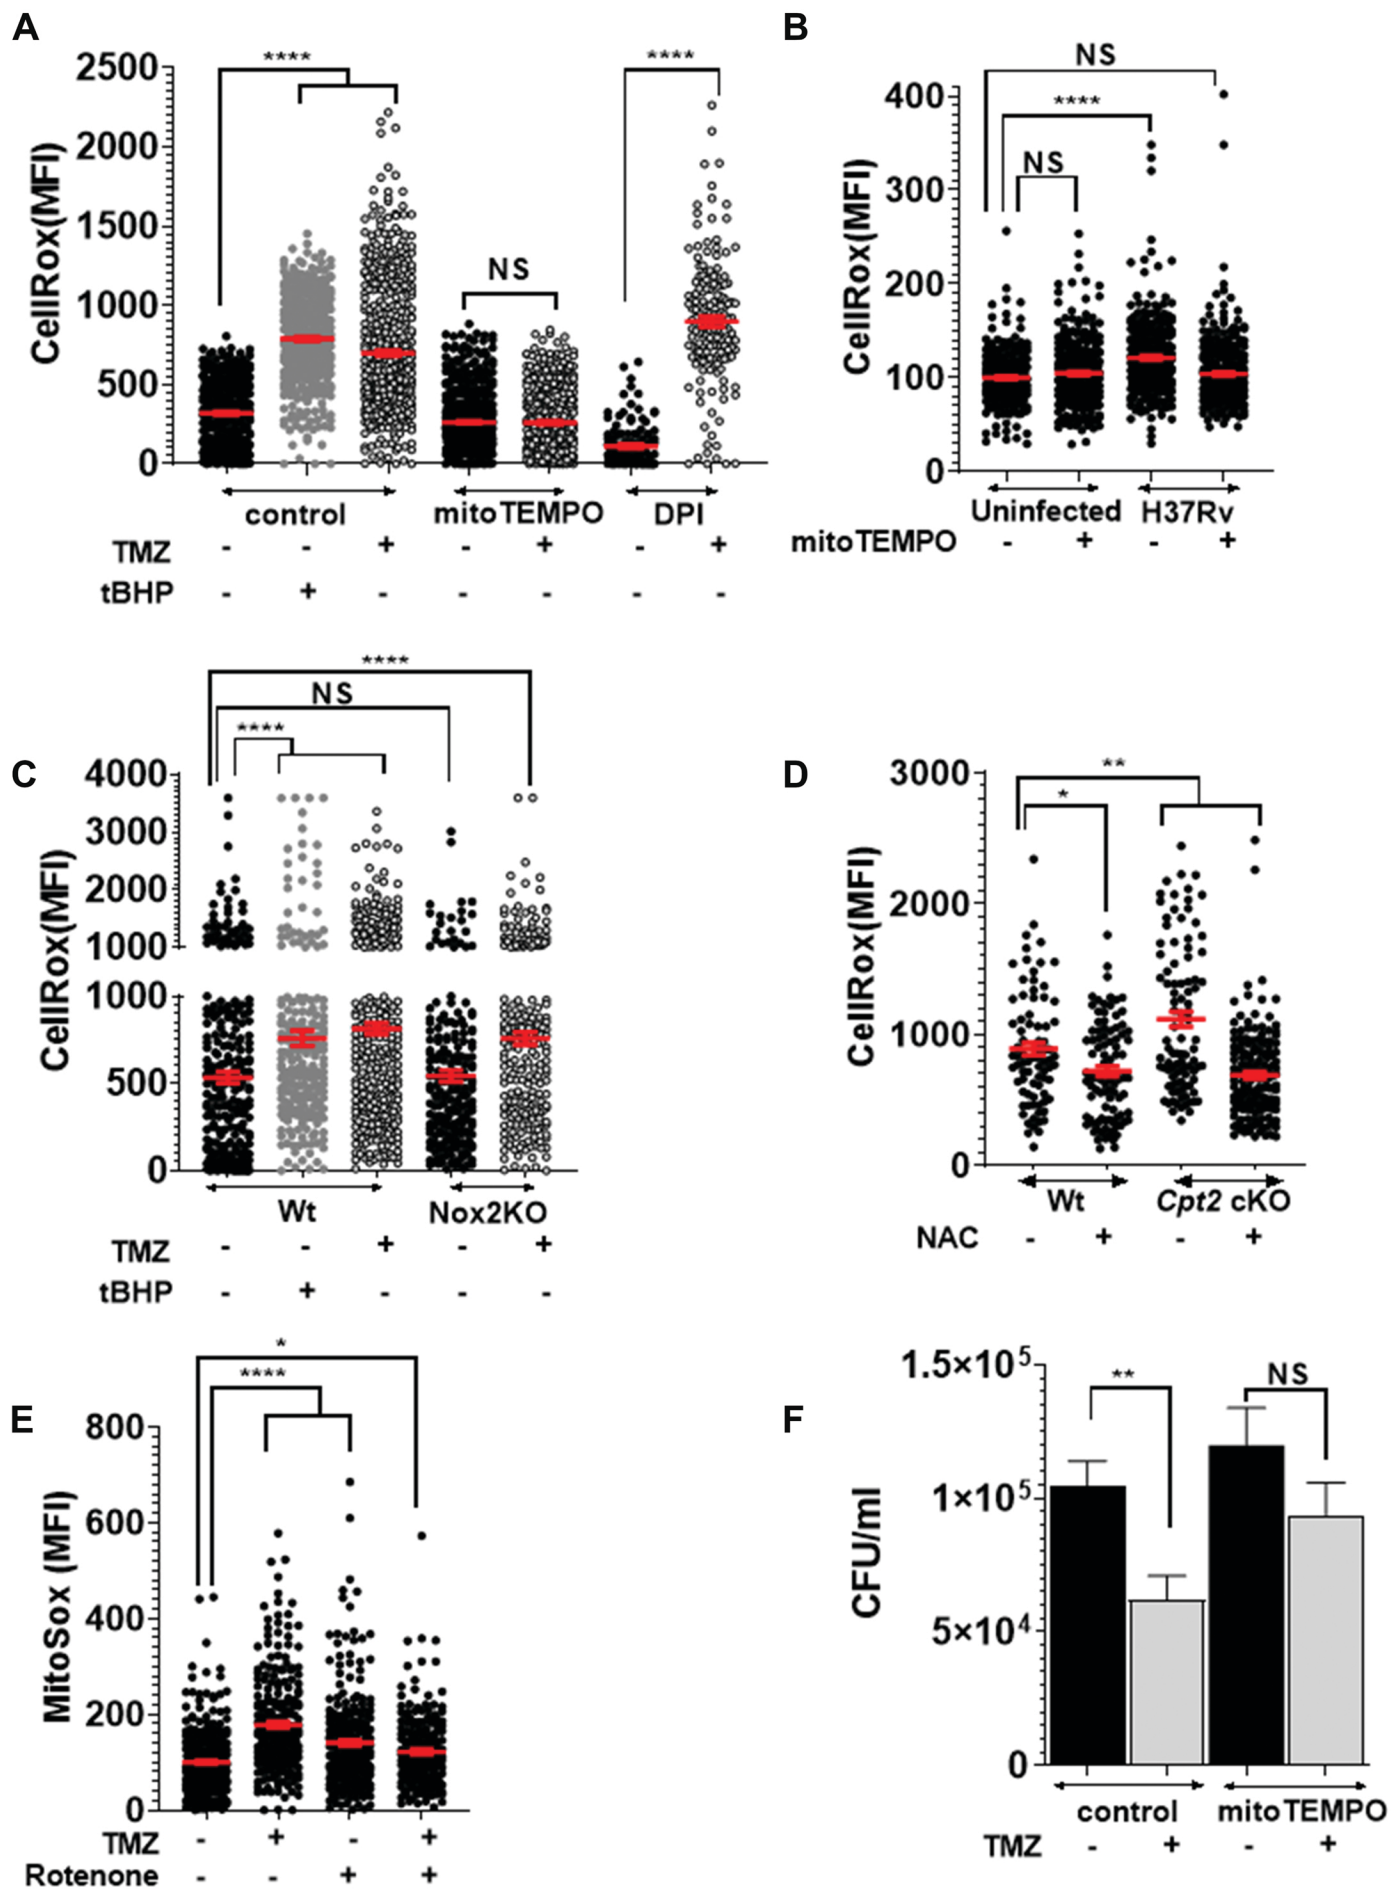



Figure 5

A

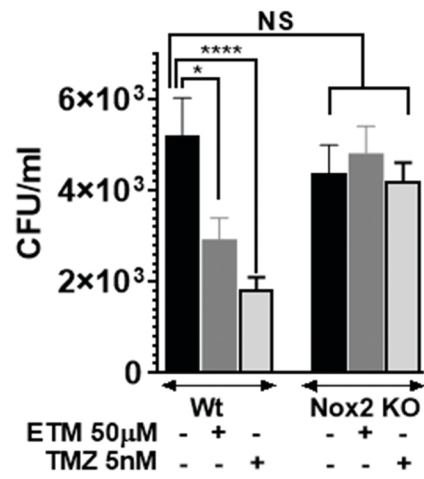

B

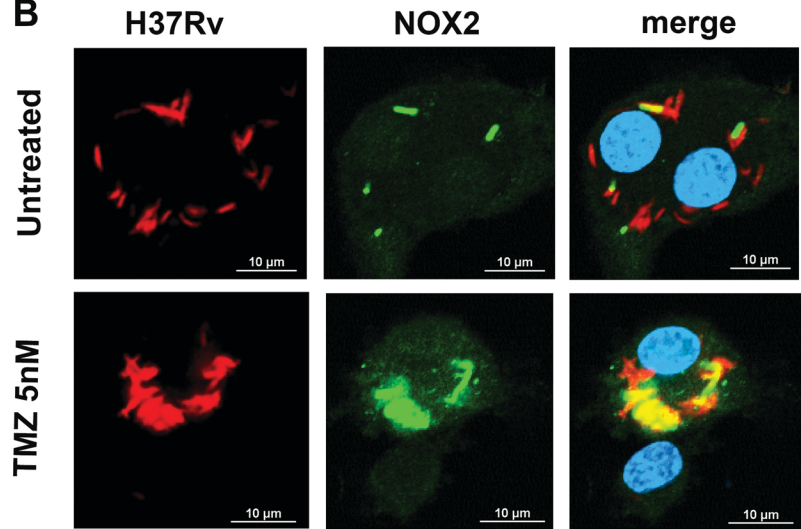

C

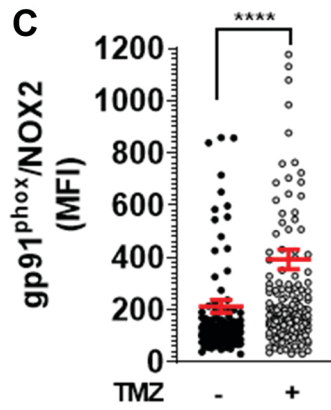

D

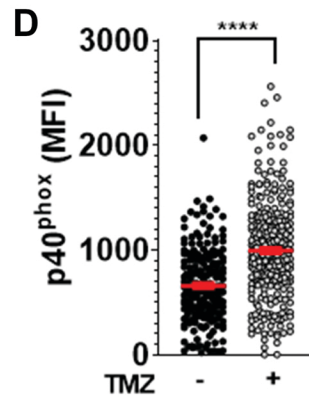

E

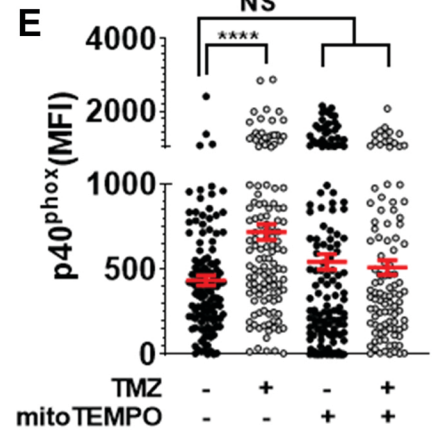

## Figure 6

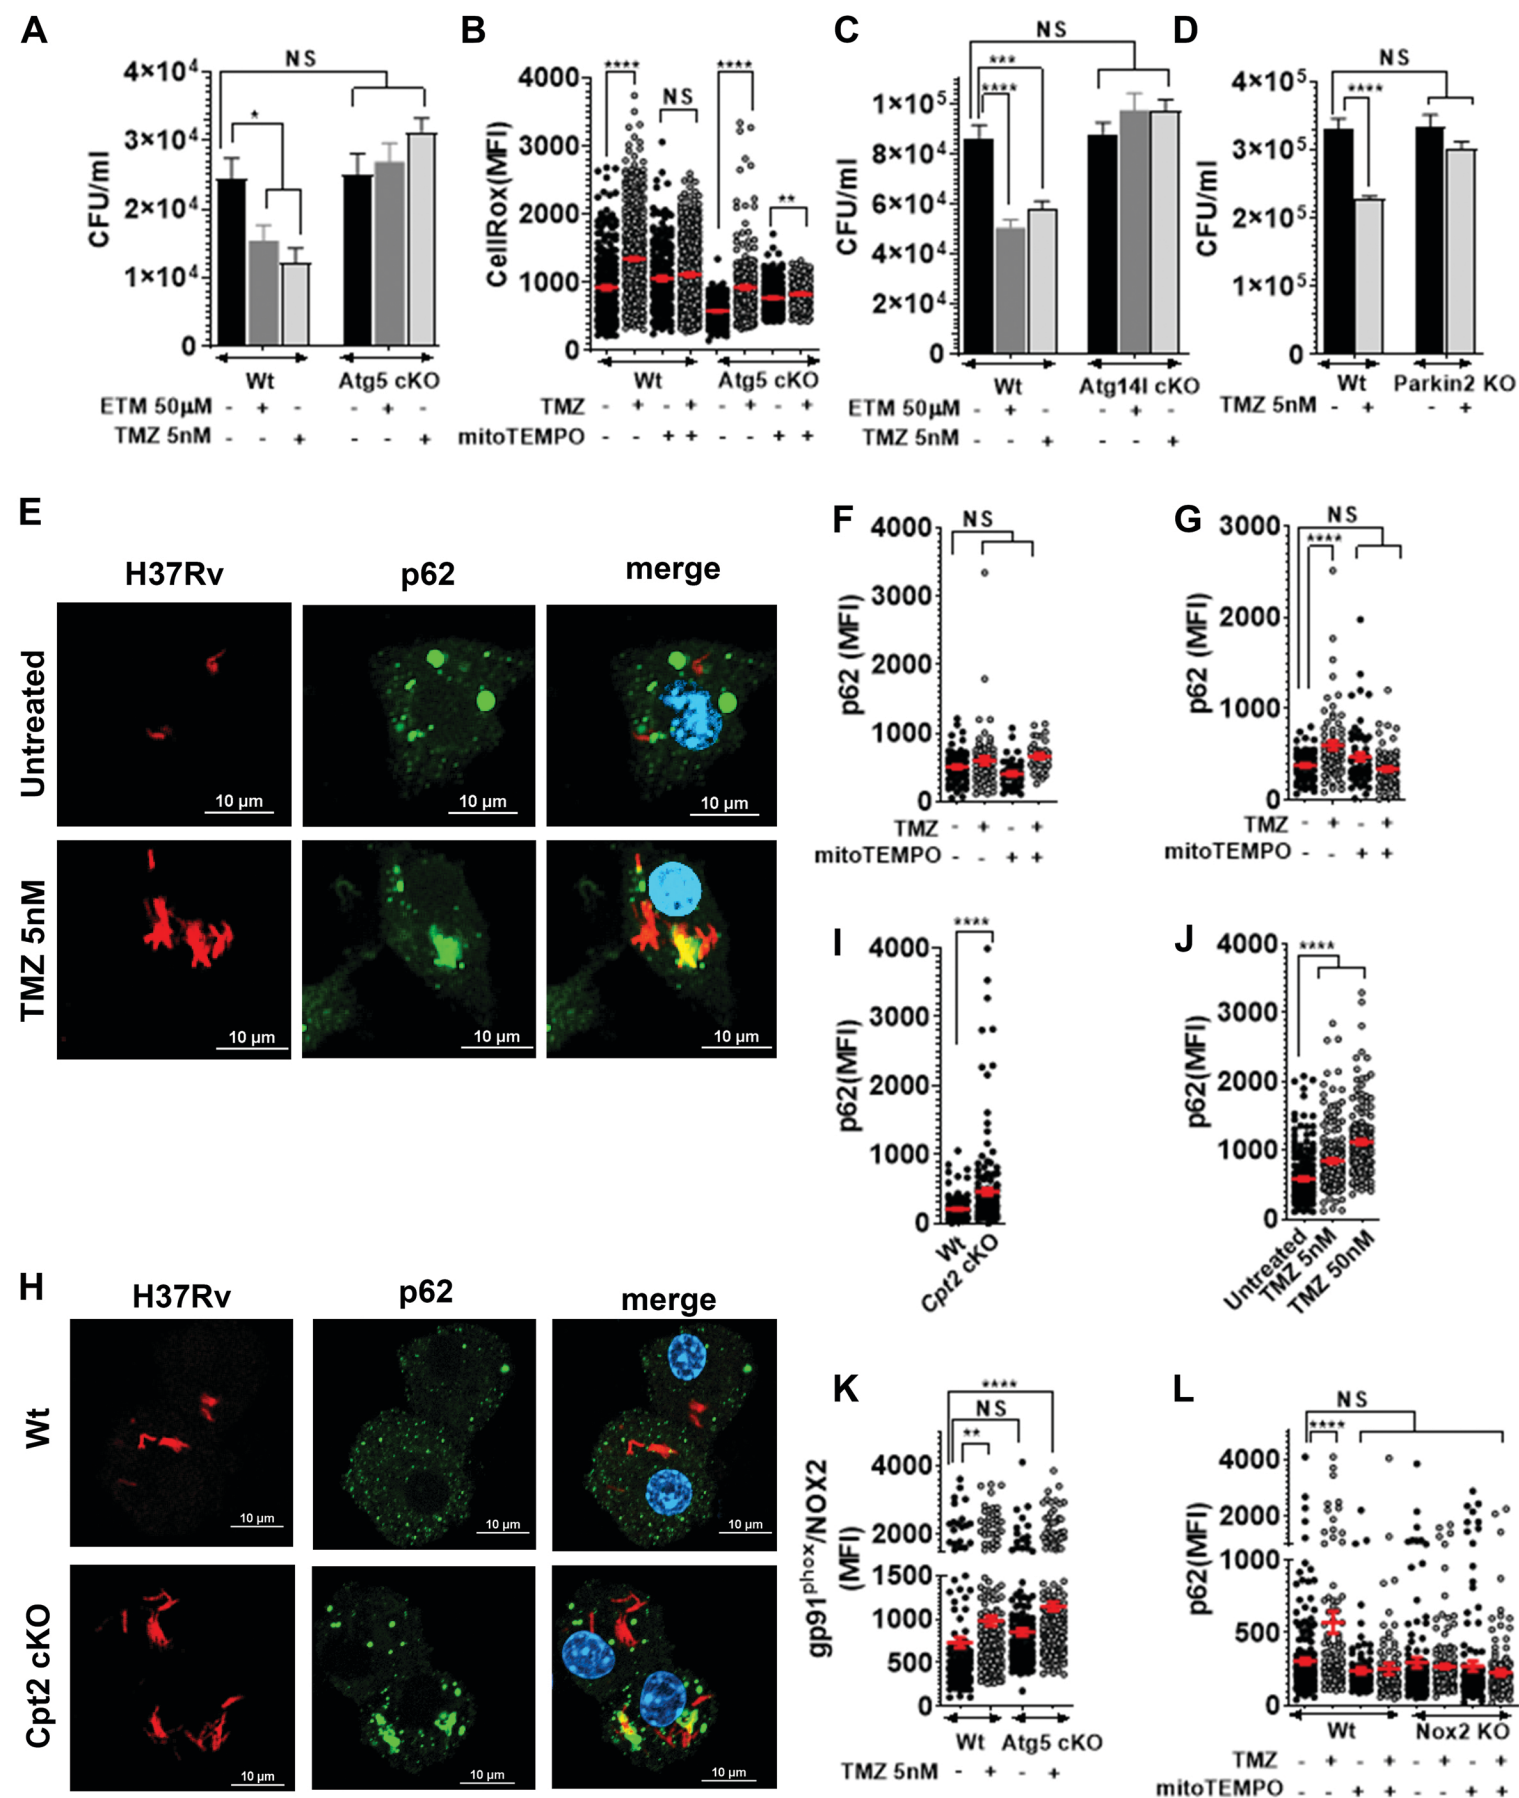

784 **SUPPLEMENTAL INFORMATION**

785 **Figure S1. Inhibition of macrophage FAO restricts intracellular *M. tuberculosis* growth.**

786 **(A)** Murine BMDMs were infected with live-dead reporter expressing H37Rv and were either  
787 untreated or treated with 50 nM TMZ for 6 days. The reporter Mtb strain constitutively expresses  
788 mCherry and has GFP controlled by a tetracycline-inducible promoter. To induce GFP expression,  
789 200 nM anhydrotetracycline was added 2 days after infection. Metabolically active bacteria  
790 express both GFP and mCherry, whereas dead bacteria are only mCherry-positive. Representative  
791 images show more dead Mtb upon TMZ treatment as compared to control. Scale bar= 10  $\mu$ m. **(B)**  
792 Macrophage were uninfected or infected with Mtb for 72h, and cell viability was assessed using  
793 calcein dye mean fluorescence intensity (MFI). Plot shows cell viability expressed as % of  
794 uninfected. Data shows mean  $\pm$  s.e.m., \*P=0.03, \*\*P $\leq$ 0.0005 ordinary one-way ANOVA. **(C)**  
795 H37Rv expressing the *Vibrio harvei* luciferase (Rv-lux) was cultured in 7H9 broth with or without  
796 1 mM TMZ for 7 days. Plot shows bacterial growth as assessed by relative luminescence units  
797 (RLU). **(D)** Minimal inhibitory concentration (MIC) of etomoxir, oxfenicine, metformin, and  
798 isoniazid (INH, positive control) was determined by culturing H37Rv for 4 days in 7H9 broth  
799 supplemented with various doses of inhibitors and measuring absorbance at 600 nm. **(E)**  
800 Intracellular growth of *M. abscessus* in BMDMs that were untreated or treated with indicated  
801 concentrations of amikacin or TMZ for 48 hours. Data shows mean  $\pm$  s.e.m., \*\*\*\*P $\leq$ 0.0001  
802 ordinary one-way ANOVA. **(F)** BODIPY fluorescent dye was used to stain lipid bodies in  
803 BMDMs that were infected for 24 hours with Mtb and either untreated or treated with TMZ. Shown  
804 here is mean  $\pm$  s.e.m of the % area in a cell occupied by BODIPY stain. \*\*\*\*P $\leq$ 0.0001, unpaired  
805 Student's t-test with Welch's correction. Using extracellular flux analysis, we quantified the **(G)**  
806 oxygen consumption rate (OCR) in uninfected control and *Cpt2* cKO BMDMs treated with 5nM

807 TMZ or solvent control for 3h, followed by sequential addition of oligomycin (A), FCCP (B), and  
808 rotenone plus antimycin (C). Data shows average +/- s.d. of 16 replicates.

809

810 **Figure S2. Pharmacokinetics study of TMZ in mice.**

811 The half-life of TMZ was determined in C57BL/6 mice that were administered the inhibitor (A)  
812 orally at 15 mg/kg or (B) intravenously at 3 mg/kg. (C) TMZ (10.66 mg/kg/day) was administered  
813 to female C57Bl/6 mice (n=5) for 48 hours using Alzet osmotic pumps and achieved  $C_{ave}$ - 34.5  
814 ng/ml. (D) Protein binding of TMZ in mouse plasma (C57BL/6) was measured using rapid  
815 equilibrium dialysis (n=3). Warfarin was used as a control. In humans TMZ is reportedly weakly  
816 protein bound (~16%)(Harpey et al., 1988).

817

818 **Figure S3. FAO inhibition enhances metabolic changes in response to Mtb infection.**

819 Unbiased metabolite profiling was performed in BMDMs to characterize the effect of Mtb  
820 infection and TMZ treatment. (A) Macrophage response to infection involved perturbations in  
821 redox homeostasis. Increased glutathione synthesis was suggested by increased methionine to  
822 cysteine conversion pathway metabolites SAM, SAH and cystathione. Ophthamate, a  
823 compositional derivative of glutathione, can reflect enhanced activity of glutathione synthetase.  
824 Marked elevations were observed in gamma-glutamyl amino acids, which are formed when  
825 gamma-glutamyl transpeptidase transfers the gamma-glutamyl moiety of glutathione to acceptor  
826 amino acids. Infection significantly increased dihydrobiopterin and biopterin. These metabolites  
827 are oxidized forms of tetrahydrobiopterin, which is a cofactor for all NOS isoforms and its  
828 depletion is associated with enzyme uncoupling and ROS generation. (B) Increases in membrane

829 phospholipids and sphingomyelin were detected 24 hpi, which were enhanced in presence of TMZ.  
830 **(C)** Tryptophan metabolism was increased with infection 24 hpi. Elevated levels of serotonin were  
831 observed, with more pronounced accumulation upon TMZ treatment. Graph shows ScaledImpData  
832 of serotonin in uninfected (UI) and infected (TB) samples at the indicated time points. The line  
833 and dot show median and mean, respectively. Tryptophan can be converted by indoleamine 2,3-  
834 dioxygenase (IDO) to kynurenine, which is further utilized for nicotinamide metabolism. TMZ  
835 treatment in infected cells increased levels of metabolites in the nicotinamide pathway, suggesting  
836 it might improve infection control in combination with SIRT 1 activators, as sirtuins are NAD<sup>+</sup>-  
837 dependent class III histone deacetylases and activating sirtuin 1 (SIRT 1) is protective in Mtb  
838 infection (Cheng et al., 2017). Other metabolic changes during infection included **(D)** increase in  
839 nucleotide sugars, with a marked increase in UDP-N-acetylglucosamine/galactosamine (UDP-  
840 GlcNAc) when FAO was inhibited. These metabolites are utilized in protein and lipid  
841 glycosylation reactions, and UDP-GlcNAc biosynthesis was shown to be important for M2  
842 macrophage polarization (Jha et al., 2015). **(E)** TMZ-induced accumulation in uracil-containing  
843 pyrimidines in Mtb infected macrophages. This may indicate an increase in dihydroorotate  
844 dehydrogenase (DHODH) activity, which catalyzes a rate-limiting step in the pyrimidine pathway.  
845 Since DHODH can supply electrons downstream of complex I of the mitochondrial ETC, it can  
846 potentially contribute to RET-ROS production. (A-F) Heatmaps show metabolite ratios in Mtb  
847 infected and uninfected (TB/Ctrl) macrophages, that were untreated (None) or TMZ treated (Drug)  
848 for 3 or 24 h. Here, significant difference ( $p \leq 0.05$ , three-way ANOVA) between groups are colored  
849 in green for metabolite ratio of  $<1$  and red for ratio of  $>1$ . Light green and red colors show groups  
850 that missed the statistical cutoff for significance  $0.05 < p < 0.10$ .)

851

852 **Figure S4. Pro-inflammatory cytokine secretion in macrophages treated with TMZ.**

853 Supernatants from uninfected or Mtb-infected BMDMs that were untreated or treated with  
854 indicated concentrations of TMZ were harvested 24 and 72 hpi. The levels of pro-inflammatory  
855 cytokines and chemokines **(A)** TNF- $\alpha$  **(B)** IL-6, **(C)** CXCL2, **(D)** IFN- $\beta$ , **(E)** CCL2, and **(F)**  
856 CXCL10 were measured using a Milliplex MAP Mouse Cytokine/Chemokine Magnetic Bead  
857 Panel. \* $P \leq 0.02$ , \*\* $P = 0.004$  calculated using ordinary one-way ANOVA.

858

859 **Table S1. Metabolite Differences Associated with Mtb infection and TMZ treatment**

860

861

862

863

864

865

866

867

868

869

870

871

# Figure S1

**A**

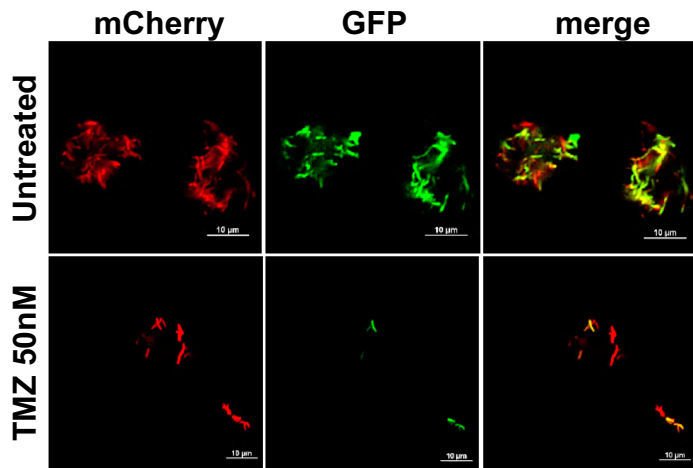

**B**

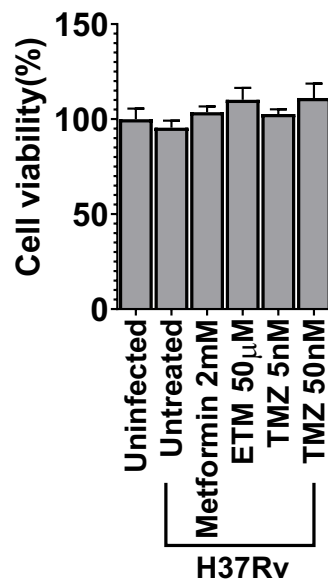

**C**

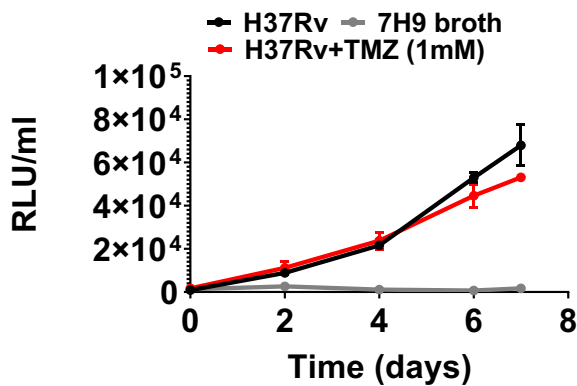

**D**

| Antitubercular activity against H37Rv in liquid media |         |
|-------------------------------------------------------|---------|
| Drug                                                  | MIC     |
| Etomoxir                                              | >250 μM |
| Oxfenicine                                            | >140 mM |
| Metformin                                             | >15 mM  |
| INH                                                   | <0.3 μM |

**E**

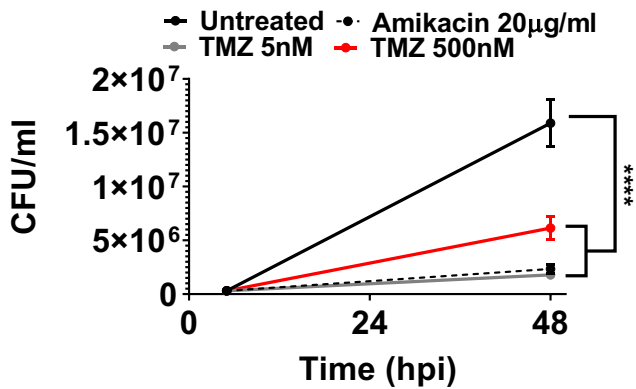

**F**

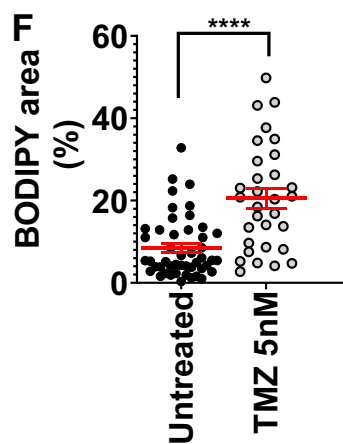

**G**

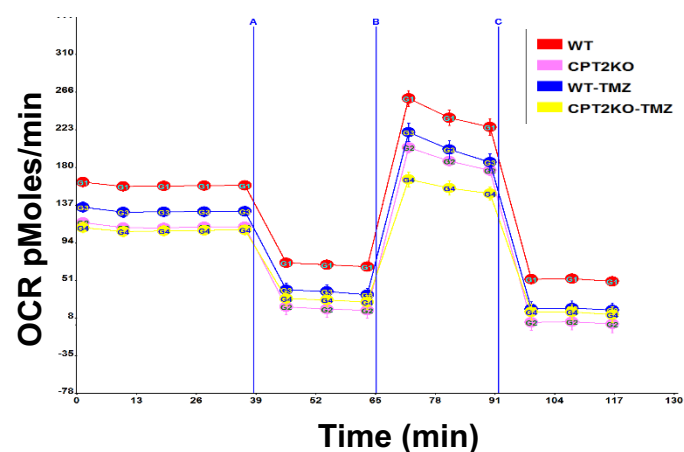

# Figure S2

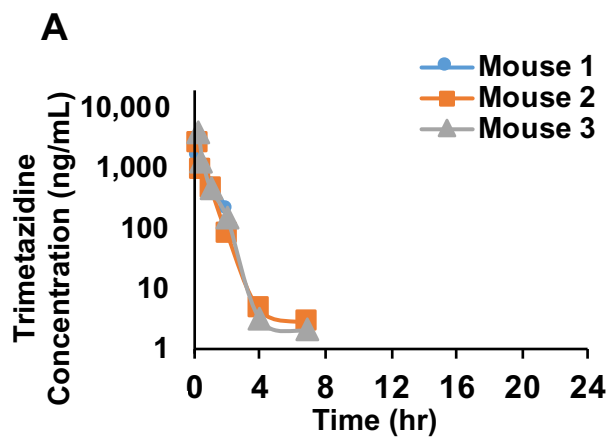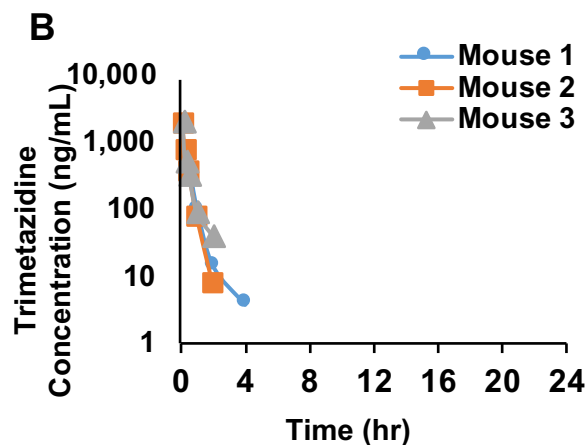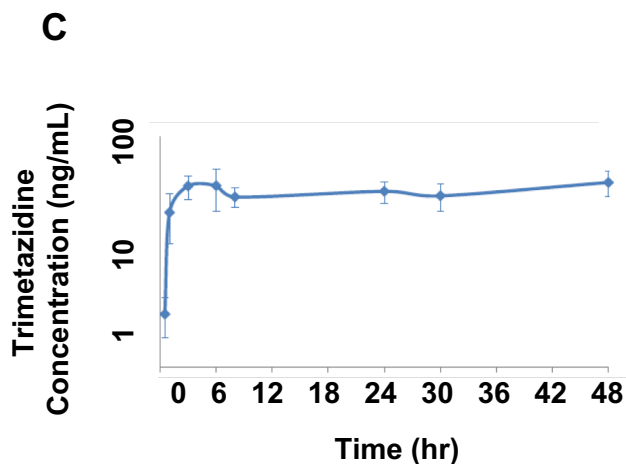

**D**

| Protein Binding in Mouse Plasma |                       |                  |
|---------------------------------|-----------------------|------------------|
| Compound                        | Percent Free Fraction | Percent Recovery |
| Trimetazidine                   | 64.86                 | 97.94            |
| Warfarin                        | 4.55                  | 110.55           |



# Figure S3

## A Redox homeostasis

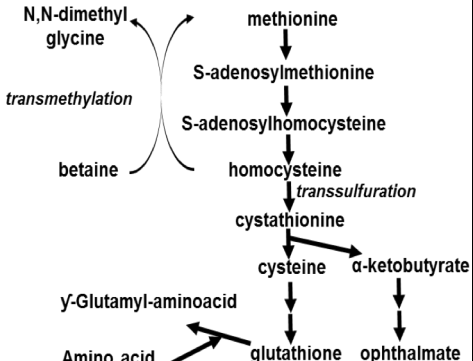

| Sub Pathway                        | Biochemical Name              | TB   |      |      |      |
|------------------------------------|-------------------------------|------|------|------|------|
|                                    |                               | Ctrl |      |      |      |
|                                    |                               | None |      | Drug |      |
|                                    |                               | 3H   | 24H  | 3H   | 24H  |
| Methionine and cysteine metabolism | S-adenosylmethionine (SAM)    | 1.01 | 1.11 | 1.07 | 1.41 |
|                                    | S-adenosylhomocysteine (SAH)  | 0.90 | 1.30 | 1.02 | 1.48 |
|                                    | cystathionine                 | 0.98 | 1.34 | 1.30 | 1.75 |
| Glutathione metabolism             | ophthalmate                   | 1.68 | 0.98 | 1.49 | 1.23 |
| Gamma-glutamyl amino acid          | gamma-glutamylcysteine        | 1.41 | 0.98 | 1.39 | 0.97 |
|                                    | gamma-glutamylglutamate       | 1.46 | 1.47 | 1.50 | 1.46 |
|                                    | gamma-glutamylglutamine       | 2.19 | 1.93 | 2.14 | 2.16 |
|                                    | gamma-glutamylglycine         | 1.63 | 0.80 | 1.46 | 1.07 |
|                                    | gamma-glutamylisoleucine*     | 1.53 | 1.00 | 1.42 | 1.15 |
|                                    | gamma-glutamylleucine         | 1.36 | 0.82 | 1.29 | 1.04 |
|                                    | gamma-glutamyl-epsilon-lysine | 1.25 | 0.72 | 1.35 | 0.64 |
|                                    | gamma-glutamylmethionine      | 1.71 | 2.28 | 1.45 | 2.40 |
|                                    | gamma-glutamylphenylalanine   | 2.73 | 1.84 | 2.36 | 2.34 |
| gamma-glutamylthreonine            | 1.55                          | 0.86 | 1.35 | 0.90 |      |
| gamma-glutamylvaline               | 1.41                          | 0.83 | 1.29 | 0.99 |      |
| Tetrahydrobiopterin Metabolism     | dihydrobiopterin              | 1.46 | 3.44 | 1.24 | 3.92 |
| Pterin Metabolism                  | pterin                        | 1.42 | 3.16 | 1.69 | 3.38 |

## B Changes in Phospholipids and sphingolipids

| Sub Pathway                   | Biochemical Name                                        | TB   |      |      |      |
|-------------------------------|---------------------------------------------------------|------|------|------|------|
|                               |                                                         | Ctrl |      |      |      |
|                               |                                                         | None |      | Drug |      |
|                               |                                                         | 3H   | 24H  | 3H   | 24H  |
| Phosphatidylcholine (PC)      | 1-myristoyl-2-palmitoyl-GPC (14:0/16:0)                 | 1.04 | 1.27 | 0.99 | 1.41 |
|                               | 1-myristoyl-2-arachidonoyl-GPC (14:0/20:4)*             | 1.15 | 1.11 | 1.12 | 1.32 |
|                               | 1-palmitoyl-2-palmitoleoyl-GPC (16:0/16:1)*             | 1.05 | 1.25 | 1.12 | 1.48 |
|                               | 1-palmitoyl-2-linoleoyl-GPC (16:0/18:2)                 | 0.94 | 1.18 | 1.06 | 1.28 |
|                               | 1-palmitoyl-2-gamma-linolenoyl-GPC (16:0/18:3n6)*       | 1.00 | 1.16 | 1.13 | 1.36 |
|                               | 1-palmitoyl-2-dihomo-linolenoyl-GPC (16:0/20:3n3 or 6)* | 0.93 | 1.04 | 1.10 | 1.27 |
|                               | 1-palmitoyl-2-docosahexaenoyl-GPC (16:0/22:6)           | 0.95 | 1.21 | 1.05 | 1.36 |
|                               | 1-oleoyl-2-linoleoyl-GPC (18:1/18:2)*                   | 1.03 | 1.19 | 1.06 | 1.19 |
|                               | 1-oleoyl-2-docosahexaenoyl-GPC (18:1/22:6)*             | 0.91 | 1.13 | 1.04 | 1.34 |
|                               | 1,2-dipalmitoyl-GPE (16:0/16:0)*                        | 1.35 | 1.25 | 1.27 | 1.39 |
| Phosphatidylethanolamine (PE) | 1-palmitoyl-2-oleoyl-GPE (16:0/18:1)                    | 1.05 | 1.18 | 1.11 | 1.41 |
|                               | 1-palmitoyl-2-linoleoyl-GPE (16:0/18:2)                 | 1.14 | 1.42 | 1.14 | 1.79 |
|                               | 1-palmitoyl-2-arachidonoyl-GPE (16:0/20:4)*             | 1.12 | 1.26 | 1.04 | 1.55 |
|                               | 1-palmitoyl-2-docosahexaenoyl-GPE (16:0/22:6)*          | 1.08 | 1.27 | 1.09 | 1.42 |
|                               | 1-stearoyl-2-docosahexaenoyl-GPE (18:0/22:6)*           | 1.22 | 1.07 | 1.14 | 1.23 |
| Phosphatidylserine (PS)       | 1-oleoyl-2-arachidonoyl-GPE (18:1/20:4)*                | 1.05 | 1.14 | 1.10 | 1.38 |
|                               | 1-palmitoyl-2-oleoyl-GPS (16:0/18:1)                    | 0.97 | 1.15 | 1.14 | 1.36 |
| Phosphatidylglycerol (PG)     | 1-palmitoyl-2-oleoyl-GPG (16:0/18:1)                    | 0.90 | 1.29 | 1.08 | 1.53 |
|                               | 1-oleoyl-2-linoleoyl-GPG (18:1/18:2)*                   | 0.88 | 1.33 | 1.10 | 1.84 |
| Phosphatidylinositol (PI)     | 1-palmitoyl-2-arachidonoyl-GPI (16:0/20:4)*             | 0.96 | 1.11 | 0.98 | 1.21 |
| Sphingomyelins                | sphingomyelin (d18:2/24:2)*                             | 1.17 | 1.22 | 0.90 | 1.80 |
|                               | sphingomyelin (d17:1/14:0, d16:1/15:0)*                 | 1.31 | 1.22 | 1.22 | 1.63 |
|                               | sphingomyelin (d18:1/14:0, d16:1/16:0)*                 | 1.03 | 1.23 | 1.13 | 1.40 |
|                               | sphingomyelin (d18:2/14:0, d18:1/14:1)*                 | 1.02 | 1.24 | 1.20 | 1.58 |
|                               | sphingomyelin (d17:1/16:0, d18:1/15:0, d16:1/17:0)*     | 1.01 | 1.17 | 1.07 | 1.28 |
|                               | sphingomyelin (d17:2/16:0, d18:2/15:0)*                 | 0.97 | 1.02 | 1.42 | 1.64 |
|                               | sphingomyelin (d18:2/16:0, d18:1/16:1)*                 | 1.06 | 1.22 | 1.15 | 1.35 |
| Ceramide PEs                  | palmitoyl-sphingosine-phosphoethanolamine (d18:1/16:0)  | 1.02 | 1.16 | 1.06 | 1.28 |

## D Changes in nucleotide sugars

| Sub Pathway        | Biochemical Name                                | TB   |      |      |      |
|--------------------|-------------------------------------------------|------|------|------|------|
|                    |                                                 | Ctrl |      |      |      |
|                    |                                                 | None |      | Drug |      |
|                    |                                                 | 3H   | 24H  | 3H   | 24H  |
| Nucleotide Sugar   | UDP-glucose                                     | 1.33 | 1.57 | 1.44 | 1.75 |
|                    | UDP-galactose                                   | 1.22 | 1.23 | 1.25 | 1.48 |
|                    | UDP-glucuronate                                 | 1.34 | 1.47 | 1.38 | 1.66 |
|                    | guanosine 5'-diphospho-fucose                   | 1.01 | 1.01 | 1.05 | 1.26 |
|                    | UDP-N-acetylglucosamine/galactos                | 1.06 | 0.90 | 1.06 | 1.83 |
| Mannose metabolism | cytidine 5'-monophospho-N-acetylneuraminic acid | 1.14 | 0.96 | 1.06 | 1.39 |
|                    | mannose-6-phosphate                             | 1.50 | 1.20 | 1.45 | 2.02 |

## C Tryptophan metabolism

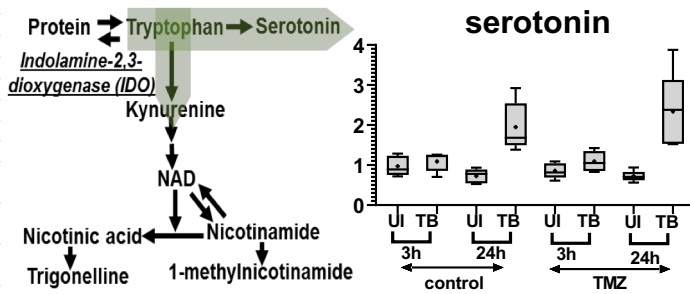

| Sub Pathway                            | Biochemical Name                                 | TB   |      |      |      |
|----------------------------------------|--------------------------------------------------|------|------|------|------|
|                                        |                                                  | Ctrl |      |      |      |
|                                        |                                                  | None |      | Drug |      |
|                                        |                                                  | 3H   | 24H  | 3H   | 24H  |
| Nicotinate and Nicotinamide Metabolism | quinolinate                                      | 0.79 | 0.78 | 0.99 | 0.72 |
|                                        | nicotinamide                                     | 1.10 | 1.19 | 1.22 | 1.27 |
|                                        | nicotinamide ribonucleotide (NMN)                | 1.00 | 1.08 | 1.31 | 1.31 |
|                                        | nicotinamide riboside                            | 1.02 | 1.11 | 1.19 | 1.24 |
|                                        | nicotinamide adenine dinucleotide (NAD+)         | 0.98 | 1.05 | 1.14 | 1.26 |
|                                        | nicotinamide adenine dinucleotide reduced (NADH) | 1.01 | 1.17 | 1.04 | 1.37 |
|                                        | 1-methylnicotinamide                             | 1.35 | 1.11 | 1.14 | 1.25 |
|                                        | trigonelline (N'-methylnicotinate)               | 1.02 | 0.94 | 0.88 | 1.23 |
|                                        | adenosine 5'-diphosphoribose (ADP-ribose)        | 1.00 | 0.84 | 1.18 | 0.94 |

## E

| Sub Pathway                               | Biochemical Name | TB   |      |      |      |
|-------------------------------------------|------------------|------|------|------|------|
|                                           |                  | Ctrl |      |      |      |
|                                           |                  | None |      | Drug |      |
|                                           |                  | 3H   | 24H  | 3H   | 24H  |
| Pyrimidine Metabolism, Orotate containing | dihydroorotate   | 1.43 | 1.82 | 1.44 | 1.66 |
|                                           | orotate          | 1.47 | 2.26 | 1.67 | 1.43 |
|                                           | orotidine        | 1.00 | 1.10 | 1.07 | 1.55 |

# Figure S4

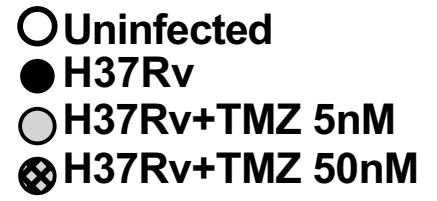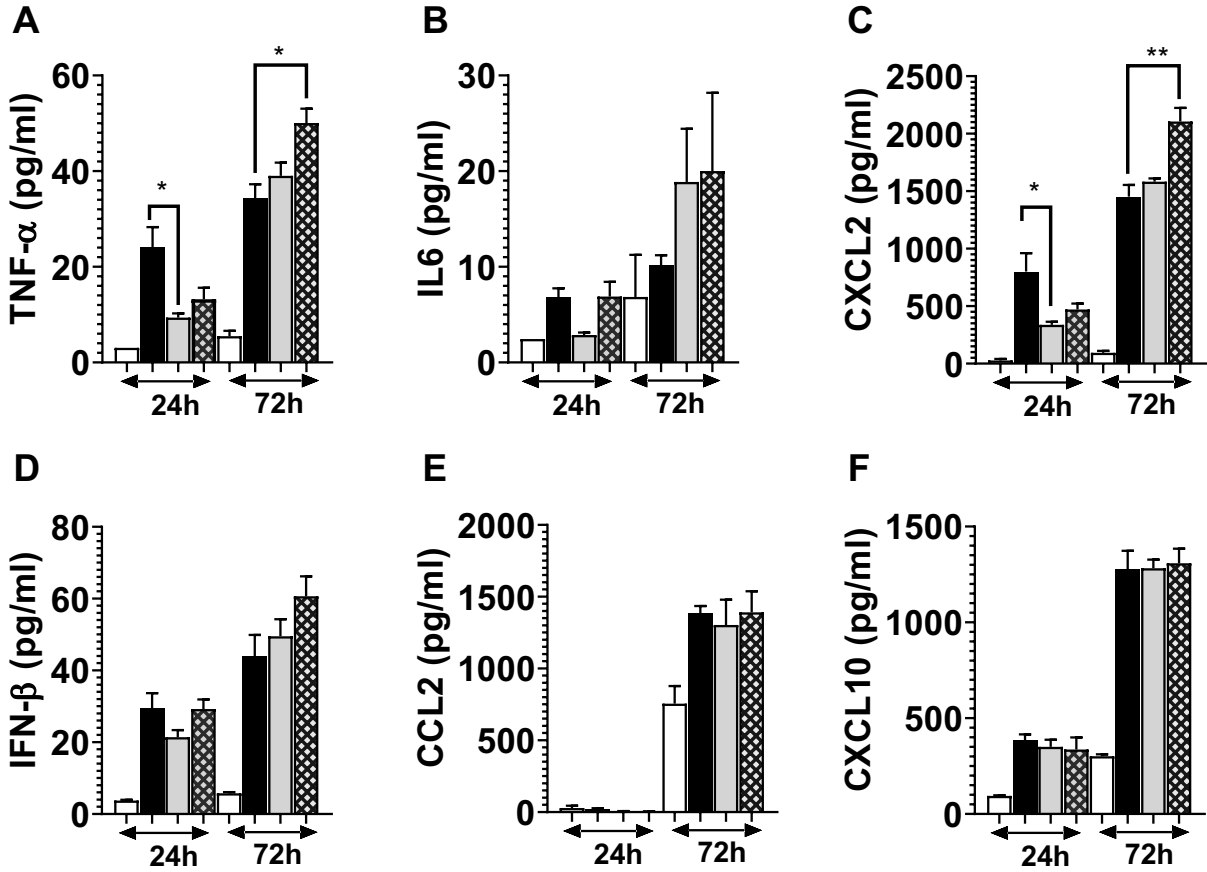

## 872 REFERENCES

- 873 Abuaita, B.H., Schultz, T.L., and O'Riordan, M.X. (2018). Mitochondria-Derived Vesicles  
874 Deliver Antimicrobial Reactive Oxygen Species to Control Phagosome-Localized  
875 *Staphylococcus aureus*. *Cell Host Microbe* 24, 625-636.e625.
- 876 Almeida, P.E., Silva, A.R., Maya-Monteiro, C.M., Töröcsik, D., D'Avila, H., Dezsö, B.,  
877 Magalhães, K.G., Castro-Faria-Neto, H.C., Nagy, L., and Bozza, P.T. (2009). *Mycobacterium*  
878 *bovis* bacillus Calmette-Guérin infection induces TLR2-dependent peroxisome proliferator-  
879 activated receptor gamma expression and activation: functions in inflammation, lipid  
880 metabolism, and pathogenesis. *J Immunol* 183, 1337-1345.
- 881 Arts, R.J.W., Carvalho, A., La Rocca, C., Palma, C., Rodrigues, F., Silvestre, R., Kleinnijenhuis,  
882 J., Lachmandas, E., Gonçalves, L.G., Belinha, A., *et al.* (2016). Immunometabolic Pathways in  
883 BCG-Induced Trained Immunity. *Cell Rep* 17, 2562-2571.
- 884 Bewley, M.A., Preston, J.A., Mohasin, M., Marriott, H.M., Budd, R.C., Swales, J., Collini, P.,  
885 Greaves, D.R., Craig, R.W., Brightling, C.E., *et al.* (2017). Impaired Mitochondrial Microbicidal  
886 Responses in Chronic Obstructive Pulmonary Disease Macrophages. *Am J Respir Crit Care Med*  
887 196, 845-855.
- 888 Brzostek, A., Pawelczyk, J., Rumijowska-Galewicz, A., Dziadek, B., and Dziadek, J. (2009).  
889 *Mycobacterium tuberculosis* is able to accumulate and utilize cholesterol. *Journal of bacteriology*  
890 191, 6584-6591.
- 891 Cheng, C.Y., Gutierrez, N.M., Marzuki, M.B., Lu, X., Foreman, T.W., Paleja, B., Lee, B.,  
892 Balachander, A., Chen, J., Tsenova, L., *et al.* (2017). Host sirtuin 1 regulates mycobacterial  
893 immunopathogenesis and represents a therapeutic target against tuberculosis. *Sci Immunol* 2.
- 894 Chouchani, E.T., Pell, V.R., Gaude, E., Aksentijević, D., Sundier, S.Y., Robb, E.L., Logan, A.,  
895 Nadochiy, S.M., Ord, E.N.J., Smith, A.C., *et al.* (2014). Ischaemic accumulation of succinate  
896 controls reperfusion injury through mitochondrial ROS. *Nature* 515, 431-435.
- 897 Clausen, B.E., Burkhardt, C., Reith, W., Renkawitz, R., and Förster, I. (1999). Conditional gene  
898 targeting in macrophages and granulocytes using *LysMcre* mice. *Transgenic Res* 8, 265-277.
- 899 Cohen, S.B., Gern, B.H., Delahaye, J.L., Adams, K.N., Plumlee, C.R., Winkler, J.K., Sherman,  
900 D.R., Gerner, M.Y., and Urdahl, K.B. (2018). Alveolar Macrophages Provide an Early  
901 *Mycobacterium tuberculosis* Niche and Initiate Dissemination. *Cell Host Microbe* 24, 439-  
902 446.e434.
- 903 Cumming, B.M., Addicott, K.W., Adamson, J.H., and Steyn, A.J. (2018). *Mycobacterium*  
904 *tuberculosis* induces decelerated bioenergetic metabolism in human macrophages. *Elife* 7.
- 905 Daniel, J., Maamar, H., Deb, C., Sirakova, T.D., and Kolattukudy, P.E. (2011). *Mycobacterium*  
906 *tuberculosis* uses host triacylglycerol to accumulate lipid droplets and acquires a dormancy-like  
907 phenotype in lipid-loaded macrophages. *PLoS Pathog* 7, e1002093.

- 908 Dézsi, C.A. (2016). Trimetazidine in Practice: Review of the Clinical and Experimental  
909 Evidence. *Am J Ther* 23, e871-879.
- 910 Divakaruni, A.S., Hsieh, W.Y., Minarrieta, L., Duong, T.N., Kim, K.K.O., Desousa, B.R.,  
911 Andreyev, A.Y., Bowman, C.E., Caradonna, K., Dranka, B.P., *et al.* (2018). Etomoxir Inhibits  
912 Macrophage Polarization by Disrupting CoA Homeostasis. *Cell Metab* 28, 490-503.e497.
- 913 Duman, C., Yaqubi, K., Hoffmann, A., Acikgöz, A.A., Korshunov, A., Bendszus, M., Herold-  
914 Mende, C., Liu, H.K., and Alfonso, J. (2019). Acyl-CoA-Binding Protein Drives Glioblastoma  
915 Tumorigenesis by Sustaining Fatty Acid Oxidation. *Cell Metab* 30, 274-289.e275.
- 916 Escoll, P., and Buchrieser, C. (2019). Metabolic reprogramming: an innate cellular defence  
917 mechanism against intracellular bacteria? *Curr Opin Immunol* 60, 117-123.
- 918 Fernández-Agüera, M.C., Gao, L., González-Rodríguez, P., Pintado, C.O., Arias-Mayenco, I.,  
919 García-Flores, P., García-Pergañeda, A., Pascual, A., Ortega-Sáenz, P., and López-Barneo, J.  
920 (2015). Oxygen Sensing by Arterial Chemoreceptors Depends on Mitochondrial Complex I  
921 Signaling. *Cell Metab* 22, 825-837.
- 922 Galván-Peña, S., and O'Neill, L.A. (2014). Metabolic reprogramming in macrophage polarization.  
923 *Front Immunol* 5, 420.
- 924 Garaude, J., Acín-Pérez, R., Martínez-Cano, S., Enamorado, M., Ugolini, M., Nistal-Villán, E.,  
925 Hervás-Stubbs, S., Pelegrín, P., Sander, L.E., Enríquez, J.A., *et al.* (2016). Mitochondrial  
926 respiratory-chain adaptations in macrophages contribute to antibacterial host defense. *Nat*  
927 *Immunol* 17, 1037-1045.
- 928 Gleeson, L.E., Sheedy, F.J., Palsson-McDermott, E.M., Triglia, D., O'Leary, S.M., O'Sullivan,  
929 M.P., O'Neill, L.A., and Keane, J. (2016). Cutting Edge: Mycobacterium tuberculosis Induces  
930 Aerobic Glycolysis in Human Alveolar Macrophages That Is Required for Control of  
931 Intracellular Bacillary Replication. *J Immunol* 196, 2444-2449.
- 932 Gonzalez-Hurtado, E., Lee, J., Choi, J., Selen Alpergin, E.S., Collins, S.L., Horton, M.R., and  
933 Wolfgang, M.J. (2017). Loss of macrophage fatty acid oxidation does not potentiate systemic  
934 metabolic dysfunction. *Am J Physiol Endocrinol Metab* 312, E381-E393.
- 935 Hall, C.J., Boyle, R.H., Astin, J.W., Flores, M.V., Oehlers, S.H., Sanderson, L.E., Ellett, F.,  
936 Lieschke, G.J., Crosier, K.E., and Crosier, P.S. (2013). Immunoresponsive gene 1 augments  
937 bactericidal activity of macrophage-lineage cells by regulating  $\beta$ -oxidation-dependent  
938 mitochondrial ROS production. *Cell Metab* 18, 265-278.
- 939 Harpey, C., Clauser, P., Labrid, C., Freyria, J.-L., and Poirier, J.-P. (1988). Trimetazidine, A  
940 Cellular Anti-ischemic Agent. *Cardiovascular Drug Reviews* 6, 292-312.
- 941 Huang, L., Nazarova, E.V., Tan, S., Liu, Y., and Russell, D.G. (2018). Growth of  
942 *Mycobacterium tuberculosis* in vivo segregates with host macrophage metabolism and ontogeny.  
943 *J Exp Med* 215, 1135-1152.

- 944 Jha, A.K., Huang, S.C., Sergushichev, A., Lampropoulou, V., Ivanova, Y., Loginicheva, E.,  
945 Chmielewski, K., Stewart, K.M., Ashall, J., Everts, B., *et al.* (2015). Network integration of  
946 parallel metabolic and transcriptional data reveals metabolic modules that regulate macrophage  
947 polarization. *Immunity* *42*, 419-430.
- 948 Kelly, B., and O'Neill, L.A. (2015). Metabolic reprogramming in macrophages and dendritic  
949 cells in innate immunity. *Cell Res* *25*, 771-784.
- 950 Kim, Y.S., Lee, H.M., Kim, J.K., Yang, C.S., Kim, T.S., Jung, M., Jin, H.S., Kim, S., Jang, J.,  
951 Oh, G.T., *et al.* (2017). PPAR- $\alpha$  Activation Mediates Innate Host Defense through Induction of  
952 TFEB and Lipid Catabolism. *J Immunol* *198*, 3283-3295.
- 953 Köster, S., Upadhyay, S., Chandra, P., Papavinasasundaram, K., Yang, G., Hassan, A., Grigsby,  
954 S.J., Mittal, E., Park, H.S., Jones, V., *et al.* (2017). Mycobacterium tuberculosis is protected from  
955 NADPH oxidase and LC3-associated phagocytosis by the LCP protein CpsA. *Proc Natl Acad Sci*  
956 *U S A* *114*, E8711-E8720.
- 957 Lachmandas, E., Beigier-Bompadre, M., Cheng, S.C., Kumar, V., van Laarhoven, A., Wang, X.,  
958 Ammerdorffer, A., Boutens, L., de Jong, D., Kanneganti, T.D., *et al.* (2016). Rewiring cellular  
959 metabolism via the AKT/mTOR pathway contributes to host defence against Mycobacterium  
960 tuberculosis in human and murine cells. *Eur J Immunol* *46*, 2574-2586.
- 961 Lampropoulou, V., Sergushichev, A., Bambouskova, M., Nair, S., Vincent, E.E., Loginicheva,  
962 E., Cervantes-Barragan, L., Ma, X., Huang, S.C., Griss, T., *et al.* (2016). Itaconate Links  
963 Inhibition of Succinate Dehydrogenase with Macrophage Metabolic Remodeling and Regulation  
964 of Inflammation. *Cell Metab* *24*, 158-166.
- 965 Langston, P.K., Nambu, A., Jung, J., Shibata, M., Aksoylar, H.I., Lei, J., Xu, P., Doan, M.T.,  
966 Jiang, H., MacArthur, M.R., *et al.* (2019). Glycerol phosphate shuttle enzyme GPD2 regulates  
967 macrophage inflammatory responses. *Nat Immunol* *20*, 1186-1195.
- 968 Lee, J., Ellis, J.M., and Wolfgang, M.J. (2015). Adipose fatty acid oxidation is required for  
969 thermogenesis and potentiates oxidative stress-induced inflammation. *Cell Rep* *10*, 266-279.
- 970 Lionetti, V., Stanley, W.C., and Recchia, F.A. (2011). Modulating fatty acid oxidation in heart  
971 failure. *Cardiovasc Res* *90*, 202-209.
- 972 Manzanillo, P.S., Ayres, J.S., Watson, R.O., Collins, A.C., Souza, G., Rae, C.S., Schneider, D.S.,  
973 Nakamura, K., Shiloh, M.U., and Cox, J.S. (2013). The ubiquitin ligase parkin mediates  
974 resistance to intracellular pathogens. *Nature* *501*, 512-516.
- 975 Manzanillo, P.S., Shiloh, M.U., Portnoy, D.A., and Cox, J.S. (2012). Mycobacterium  
976 tuberculosis activates the DNA-dependent cytosolic surveillance pathway within macrophages.  
977 *Cell Host Microbe* *11*, 469-480.
- 978 Marrero, J., Rhee, K.Y., Schnappinger, D., Pethe, K., and Ehrt, S. (2010). Gluconeogenic carbon  
979 flow of tricarboxylic acid cycle intermediates is critical for Mycobacterium tuberculosis to  
980 establish and maintain infection. *Proc Natl Acad Sci U S A* *107*, 9819-9824.

- 981 Martin, C.J., Booty, M.G., Rosebrock, T.R., Nunes-Alves, C., Desjardins, D.M., Keren, I.,  
982 Fortune, S.M., Remold, H.G., and Behar, S.M. (2012). Efferocytosis is an innate antibacterial  
983 mechanism. *Cell Host Microbe* *12*, 289-300.
- 984 Martinez, J., Malireddi, R.K., Lu, Q., Cunha, L.D., Pelletier, S., Gingras, S., Orchard, R., Guan,  
985 J.L., Tan, H., Peng, J., *et al.* (2015). Molecular characterization of LC3-associated phagocytosis  
986 reveals distinct roles for Rubicon, NOX2 and autophagy proteins. *Nat Cell Biol* *17*, 893-906.
- 987 Michelucci, A., Cordes, T., Ghelfi, J., Pailot, A., Reiling, N., Goldmann, O., Binz, T., Wegner,  
988 A., Tallam, A., Rausell, A., *et al.* (2013). Immune-responsive gene 1 protein links metabolism to  
989 immunity by catalyzing itaconic acid production. *Proc Natl Acad Sci U S A* *110*, 7820-7825.
- 990 Mills, E.L., Kelly, B., Logan, A., Costa, A.S.H., Varma, M., Bryant, C.E., Tourlomousis, P.,  
991 Däbritz, J.H.M., Gottlieb, E., Latorre, I., *et al.* (2016). Succinate Dehydrogenase Supports  
992 Metabolic Repurposing of Mitochondria to Drive Inflammatory Macrophages. *Cell* *167*, 457-  
993 470.e413.
- 994 Munoz-Elias, E.J., and McKinney, J.D. (2005). Mycobacterium tuberculosis isocitrate lyases 1  
995 and 2 are jointly required for in vivo growth and virulence. *Nat Med* *11*, 638-644.
- 996 Nair, S., Huynh, J.P., Lampropoulou, V., Loginicheva, E., Esaulova, E., Gounder, A.P., Boon,  
997 A.C.M., Schwarzkopf, E.A., Bradstreet, T.R., Edelson, B.T., *et al.* (2018). *Irg1* expression in  
998 myeloid cells prevents immunopathology during *M. tuberculosis* infection. *J Exp Med* *215*,  
999 1035-1045.
- 1000 Napier, R.J., Rafi, W., Cheruvu, M., Powell, K.R., Zaunbrecher, M.A., Bornmann, W., Salgame,  
1001 P., Shinnick, T.M., and Kalman, D. (2011). Imatinib-sensitive tyrosine kinases regulate  
1002 mycobacterial pathogenesis and represent therapeutic targets against tuberculosis. *Cell Host*  
1003 *Microbe* *10*, 475-485.
- 1004 Nazarewicz, R.R., Dikalova, A.E., Bikineyeva, A., and Dikalov, S.I. (2013). Nox2 as a potential  
1005 target of mitochondrial superoxide and its role in endothelial oxidative stress. *Am J Physiol*  
1006 *Heart Circ Physiol* *305*, H1131-1140.
- 1007 Nunes, P., Demaux, N., and Dinauer, M.C. (2013). Regulation of the NADPH oxidase and  
1008 associated ion fluxes during phagocytosis. *Traffic* *14*, 1118-1131.
- 1009 Olive, A.J., Smith, C.M., Kiritsy, M.C., and Sasseti, C.M. (2018). The Phagocyte Oxidase  
1010 Controls Tolerance to *Mycobacterium tuberculosis*. *J Immunol* *201*, 1705-1716.
- 1011 Ouimet, M., Koster, S., Sakowski, E., Ramkhalawon, B., van Solingen, C., Oldebeken, S.,  
1012 Karunakaran, D., Portal-Celhay, C., Sheedy, F.J., Ray, T.D., *et al.* (2016). Mycobacterium  
1013 tuberculosis induces the miR-33 locus to reprogram autophagy and host lipid metabolism. *Nat*  
1014 *Immunol* *17*, 677-686.
- 1015 Pandey, A.K., and Sasseti, C.M. (2008). Mycobacterial persistence requires the utilization of  
1016 host cholesterol. *Proc Natl Acad Sci U S A* *105*, 4376-4380.

- 1017 Parihar, S.P., Guler, R., Khutlang, R., Lang, D.M., Hurdal, R., Mhlana, M.M., Suzuki, H.,  
1018 Marais, A.D., and Brombacher, F. (2014). Statin therapy reduces the mycobacterium tuberculosis  
1019 burden in human macrophages and in mice by enhancing autophagy and phagosome maturation.  
1020 *J Infect Dis* 209, 754-763.
- 1021 Peyron, P., Vaubourgeix, J., Poquet, Y., Levillain, F., Botanch, C., Bardou, F., Daffe, M., Emile,  
1022 J.F., Marchou, B., Cardona, P.J., *et al.* (2008a). Foamy macrophages from tuberculous patients'  
1023 granulomas constitute a nutrient-rich reservoir for *M. tuberculosis* persistence. *PLoS Pathog* 4,  
1024 e1000204.
- 1025 Peyron, P., Vaubourgeix, J., Poquet, Y., Levillain, F., Botanch, C., Bardou, F., Daffé, M., Emile,  
1026 J.F., Marchou, B., Cardona, P.J., *et al.* (2008b). Foamy macrophages from tuberculous patients'  
1027 granulomas constitute a nutrient-rich reservoir for *M. tuberculosis* persistence. *PLoS Pathog* 4,  
1028 e1000204.
- 1029 Pinegin, B., Vorobjeva, N., Pashenkov, M., and Chernyak, B. (2018). The role of mitochondrial  
1030 ROS in antibacterial immunity. *J Cell Physiol* 233, 3745-3754.
- 1031 Russell, D.G., Cardona, P.J., Kim, M.J., Allain, S., and Altare, F. (2009). Foamy macrophages  
1032 and the progression of the human tuberculosis granuloma. *Nat Immunol* 10, 943-948.
- 1033 Scialò, F., Fernández-Ayala, D.J., and Sanz, A. (2017). Role of Mitochondrial Reverse Electron  
1034 Transport in ROS Signaling: Potential Roles in Health and Disease. *Front Physiol* 8, 428.
- 1035 Scialò, F., Sriram, A., Fernández-Ayala, D., Gubina, N., Löhmus, M., Nelson, G., Logan, A.,  
1036 Cooper, H.M., Navas, P., Enríquez, J.A., *et al.* (2016). Mitochondrial ROS Produced via Reverse  
1037 Electron Transport Extend Animal Lifespan. *Cell Metab* 23, 725-734.
- 1038 Shi, L., Salamon, H., Eugenin, E.A., Pine, R., Cooper, A., and Gennaro, M.L. (2015). Infection  
1039 with *Mycobacterium tuberculosis* induces the Warburg effect in mouse lungs. *Sci Rep* 5, 18176.
- 1040 Singh, V., Jamwal, S., Jain, R., Verma, P., Gokhale, R., and Rao, K.V. (2012). *Mycobacterium*  
1041 tuberculosis-driven targeted recalibration of macrophage lipid homeostasis promotes the foamy  
1042 phenotype. *Cell Host Microbe* 12, 669-681.
- 1043 Singhal, A., Jie, L., Kumar, P., Hong, G.S., Leow, M.K., Paleja, B., Tsenova, L., Kurepina, N.,  
1044 Chen, J., Zolezzi, F., *et al.* (2014). Metformin as adjunct antituberculosis therapy. *Sci Transl*  
1045 *Med* 6, 263ra159.
- 1046 Sun, J., Singh, V., Lau, A., Stokes, R.W., Obregón-Henao, A., Orme, I.M., Wong, D., Av-Gay,  
1047 Y., and Hmama, Z. (2013). *Mycobacterium tuberculosis* nucleoside diphosphate kinase  
1048 inactivates small GTPases leading to evasion of innate immunity. *PLoS Pathog* 9, e1003499.
- 1049 Upadhyay, S., and Philips, J.A. (2019). LC3-associated phagocytosis: host defense and microbial  
1050 response. *Curr Opin Immunol* 60, 81-90.
- 1051 Van den Bossche, J., O'Neill, L.A., and Menon, D. (2017). Macrophage Immunometabolism:  
1052 Where Are We (Going)? *Trends Immunol* 38, 395-406.

- 1053 Vorobjeva, N., Prikhodko, A., Galkin, I., Pletjushkina, O., Zinovkin, R., Sud'ina, G., Chernyak,  
1054 B., and Pinegin, B. (2017). Mitochondrial reactive oxygen species are involved in  
1055 chemoattractant-induced oxidative burst and degranulation of human neutrophils in vitro. *Eur J*  
1056 *Cell Biol* *96*, 254-265.
- 1057 Wang, T., Fahrman, J.F., Lee, H., Li, Y.J., Tripathi, S.C., Yue, C., Zhang, C., Lifshitz, V.,  
1058 Song, J., Yuan, Y., *et al.* (2018). JAK/STAT3-Regulated Fatty Acid  $\beta$ -Oxidation Is Critical for  
1059 Breast Cancer Stem Cell Self-Renewal and Chemoresistance. *Cell Metab* *27*, 1357.
- 1060 Wang, Y., Palmfeldt, J., Gregersen, N., Makhov, A.M., Conway, J.F., Wang, M., McCalley,  
1061 S.P., Basu, S., Alharbi, H., St Croix, C., *et al.* (2019). Mitochondrial fatty acid oxidation and the  
1062 electron transport chain comprise a multifunctional mitochondrial protein complex. *J Biol Chem*  
1063 *294*, 12380-12391.
- 1064 West, A.P., Brodsky, I.E., Rahner, C., Woo, D.K., Erdjument-Bromage, H., Tempst, P., Walsh,  
1065 M.C., Choi, Y., Shadel, G.S., and Ghosh, S. (2011). TLR signalling augments macrophage  
1066 bactericidal activity through mitochondrial ROS. *Nature* *472*, 476-480.
- 1067 Wolf, A.J., Linas, B., Trevejo-Nuñez, G.J., Kincaid, E., Tamura, T., Takatsu, K., and Ernst, J.D.  
1068 (2007). Mycobacterium tuberculosis infects dendritic cells with high frequency and impairs their  
1069 function in vivo. *J Immunol* *179*, 2509-2519.
- 1070 Wong, K.W., and Jacobs, W.R. (2011). Critical role for NLRP3 in necrotic death triggered by  
1071 Mycobacterium tuberculosis. *Cell Microbiol* *13*, 1371-1384.
- 1072 Xue, J., Schmidt, S.V., Sander, J., Draffehn, A., Krebs, W., Quester, I., De Nardo, D., Gohel,  
1073 T.D., Emde, M., Schmidleithner, L., *et al.* (2014). Transcriptome-based network analysis reveals  
1074 a spectrum model of human macrophage activation. *Immunity* *40*, 274-288.  
1075
